# Supplementary material for: Transcriptional regulatory network of WOX11 is involved in the control of crown root development, cytokinin signals, and redox in rice
Source: PubMed Central journal article supplement (PMC5853245; doi:10.1093/jxb/erx153), 2017-07-11
Supplement: erx153_suppl_supplementary_figures_s1_s3_tables_s1_s7.pdf [file erx153_suppl_supplementary_figures_s1_s3_tables_s1_s7.pdf]

## Supplemental Data:

**Fig. S1** Determination of *WOX11* expression level and reproducibility of RNA-seq repeats in *wox11* and wild type (HY) root tips.

**Fig. S2** Transcript profiles of the dysregulated genes in the indicated tissue/organ and root tip region in *wox11*. LF, leaf; ST, stem; RO, root; AN, anther; PI, pistil; OV, ovary; EN, endosperm; RC, root cap; DZ, division zone; EZ, elongation zone; M1, M2, M3, M4, and M5; different region in maturation zone.

**Fig. S3** Detection of transcripts of two representative differentially expressed genes in root tip (**a, e**) and initialing crown roots (**c**). Probes used are antisense in **a, c** and **e**, sense in **b, d** and **f**. Bars = 200  $\mu$ m.

**Table S1.** Primer used in this study.

**Table S2.** RNA-Seq reads and analysis data of *wox11* mutant and wild type (HY)

**Table S3.** WOX11-binding motif numbers in the down- or up-regulated genes.

**Table S4.** Root-specific differentially expressed genes in *wox11* root tips.

**Table S5.** Cytokinin-inducible genes regulated by *WOX11*.

**Table S6.** Stress related differentially expressed genes

**Table S7.** Metabolism enrichment GO

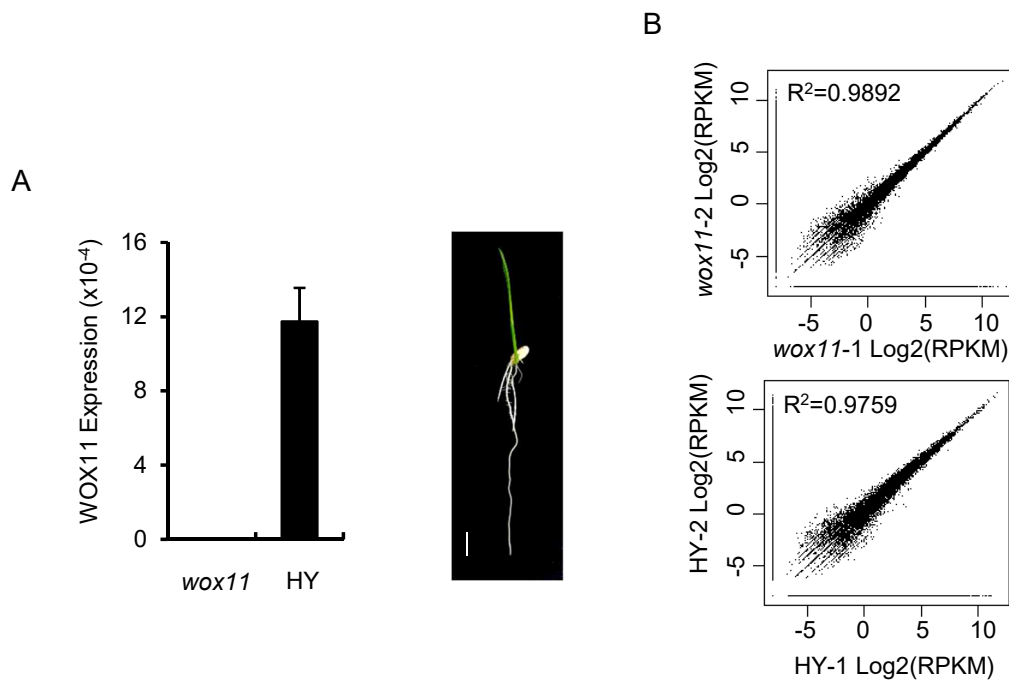

**Supplemental Fig.1 Determination of *WOX11* expression level and reproducibility of RNA-seq repeats in *wox11* and wild type root tips. (A)** left panel, qRT-PCR examination of *WOX11* expression in *wox11* and wild type (HY). Right panel shows the 7 days seedling of which we harvested the 3-5 mm root tip for RNA-seq. Bar=1cm **(B)** Two-wise scatter plots of RNA-seq reads between two biological repeats. Each point represent one gene locus. RPKM, Reads Per Kilobase per Million reads. Correlation coefficient  $R^2$  indicated.

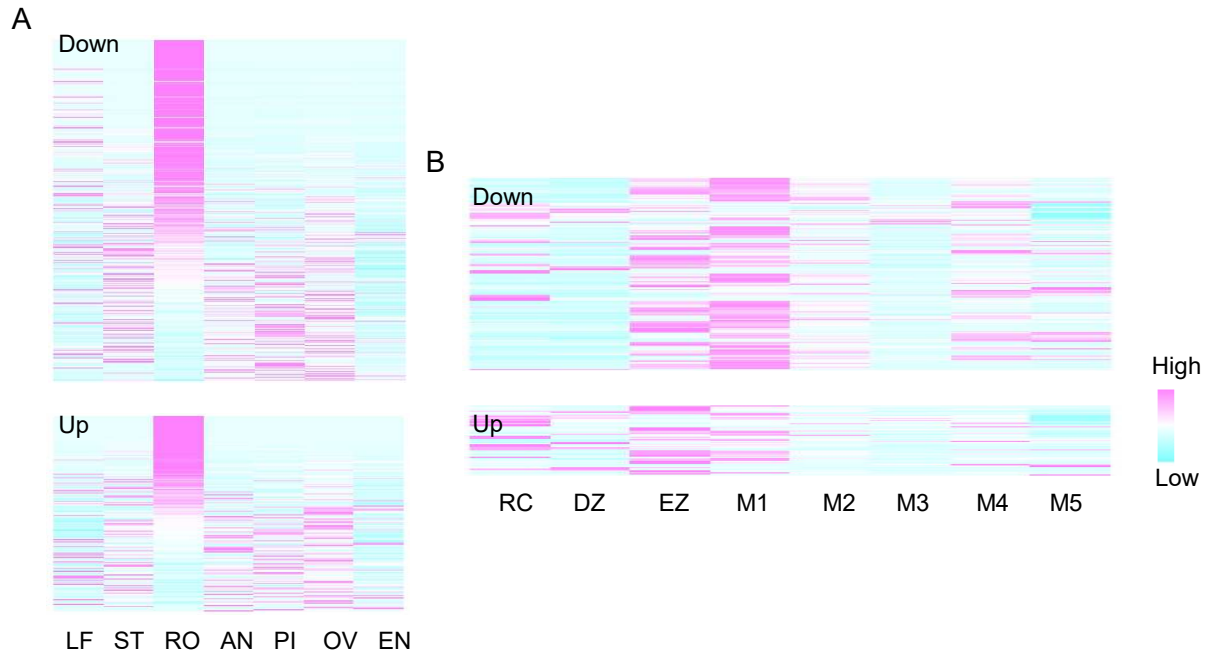

**Supplemental Fig.2 Transcription profiles of expression dysregulated genes in the indicated tissue/organ and root tip region in *wox11*.** (A) Heat map of transcription profiles in the indicated tissue or organ of expression dysregulated genes in *wox11*. LF, leaf; ST, stem; RO, root; AN, anther; PI, pistil; OV, ovary; EN, endosperm. (B) Heat map profile of transcripts of root specific expressed genes regulated by *WOX11* in different regions of root tip, RC, root cap; DZ, division zone; EZ, elongation zone; M1, M2, M3, M4, and M5; different maturation zone.

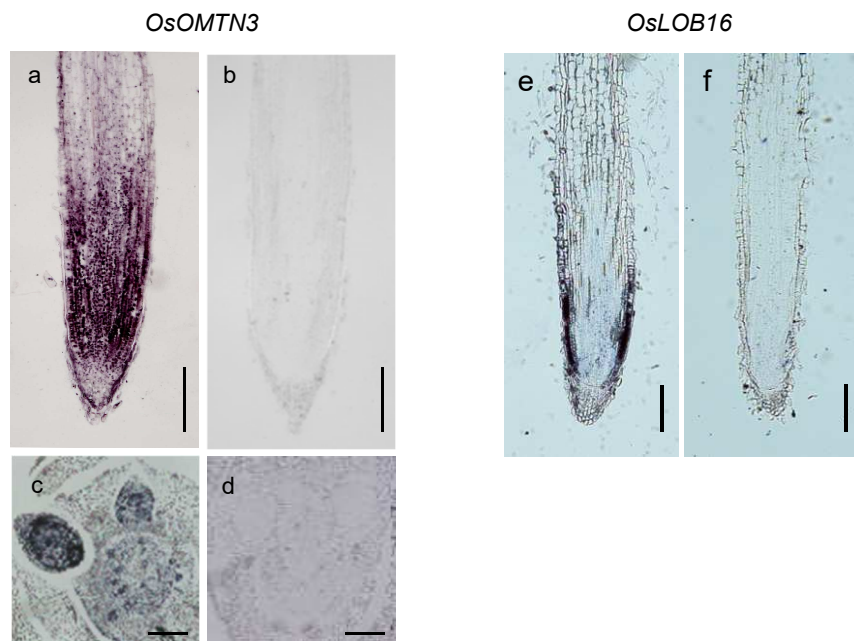

**Supplemental Fig. S3** Detection of transcripts of two representative DEGs in root tip (**a**, **e**) and initialing crown roots (**c**). Probes used are antisense in **a**, **c** and **e**, sense in **b**, **d** and **f**. Bars = 200  $\mu$ m.

**Supplemental Table1. Primer used in this study.**

| Primers for ChIP analysis                | Primer sequence                   |
|------------------------------------------|-----------------------------------|
| Chip 01g19694 F1                         | AGGCAACTCAATGAAAAC TAACAAC        |
| Chip 01g19694 R1                         | TAGAACCATCAGTAACCCAAGTTCA         |
| Chip 01g46760 F1                         | GCTCCTCGGACCTTTCTTCC              |
| Chip 01g46760 F2                         | GGGAGTAGTGGGTATCACCAATG           |
| Chip 01g46760 R1                         | CCCTCACCAGAGAGAGCAAAA             |
| Chip 01g46760 R2                         | TGTGAGGATTGCTATAGTTAAAGTTTATTTATG |
| Chip 01g54890 F                          | GCCAAACACAGCCTTAGAGGA             |
| Chip 01g54890 R                          | GCGCTCTGTTTATTAATGCACG            |
| Chip 02g57490 F1                         | TAGTAAGGCAGAGGACGTTGGC            |
| Chip 02g57490 F2                         | AACCCACA ACTAACTACGGGC            |
| Chip 02g57490 R1                         | GGAGGACAGGTAGGGTAGGGTG            |
| Chip 02g57490 R2                         | AAATGTAGCCACTTTTTTTGCGA           |
| Chip 05g06970 F1                         | TTACCCATTCTTCCATTAGCAGAAT         |
| Chip 05g06970 F2                         | TTAGGCCCTGAACCTAGCAAATA           |
| Chip 05g06970 R1                         | GATGCCCCATGCTTCGATAT              |
| Chip 05g06970 R2                         | TGCTTGCTTAATTGACTTCCTACCT         |
| Chip 08g35210 F1                         | ATTACTCAATTAGGTTACAATTATAGTGACAGG |
| Chip 08g35210 F2                         | GGCCTTCAGATCCAAGGCTT              |
| Chip 08g35210 R1                         | AACCACTAGCAGATCACACCCA            |
| Chip 08g35210 R2                         | TGATTAATGCTTGAAATTCAGAAAATGTAT    |
| Chip 11g02130 F                          | GACCCTCGTAGACATATTTTGACCA         |
| Chip 11g02130 R                          | ATGGCCTTGGAACCACCA                |
| Chip 12g41680 F1                         | CTTTCTAGCAGCAAACACATTTAGC         |
| Chip 12g41680 F2                         | ATCAGTTAAATGGTCTCCAGTGAAGC        |
| Chip 12g41680 R1                         | TAATCATTTGGGATTTGACATTCAT         |
| Chip 12g41680 R2                         | TCCGAGAATTGAAACTAACAAAGTTAAT      |
| Primers for <i>in situ</i> hybridization | Primer sequence                   |
| 01g19694 F                               | TACTTCGACACTGGCACAA               |
| 01g19694 R                               | GTCCTCGGCCTATCTAACA               |
| 03g10210 F                               | TCCTCCAGAACTGCCACC                |
| 03g10210 R                               | GCAAAGTCACCGCTAAAGAT              |
| 06g44930 F                               | CCGTGGGGTGATCCGTCT                |
| 06g44930 R                               | ACTGTGAACAGCGATTTTGC              |
| 07g38170 F                               | GGGATCAGTGCTGTGATGTG              |
| 07g38170 R                               | GAATGAAGTGAAGGAAGCCAC             |
| 12g41680 F                               | AGCAGCAGCCATTTCA                  |
| 12g41680 R                               | GGTCCTGTGCAGAGTCATC               |
| Primers for quantitative RT-PCR          | Primer sequence                   |
| actin1 F                                 | TGTATGCCAGTGGTCGTACCA             |
| actin1 R                                 | CCAGCAAGGTCGAGACGAA               |
| rt-01g19694 F                            | CATCAACCAGAGGAAGAGGCA             |

|               |                          |
|---------------|--------------------------|
| rt-01g19694 R | GGCGGCATTGCTCAAAAAT      |
| rt-01g46760 F | TTTGCAGCTGAGTTTGCTGG     |
| rt-01g46760 R | AATAGCACACGCTCATCGGTC    |
| rt-01g47070 F | GCCCCAAGCCTGAGTAATTA     |
| rt-01g47070 R | GATGCGTATGAACGGATCTCC    |
| rt-01g54890 F | CGTACCTCCCGCTCAACGA      |
| rt-01g54890 R | CGACGACGACGACGACGACA     |
| rt-02g02400 F | AGGAGGCAGAAGGCGACGATACA  |
| rt-02g02400 R | TCTTCACATGCTTGGCTTCACGTT |
| rt-02g33820 F | TGAACGCAAGAACGAACGG      |
| rt-02g33820 R | AAAAGCGACGACGTATGACGA    |
| rt-02g57490 F | GTGCAACGTCATAGTGAAGCAA   |
| rt-02g57490 R | GGTCCAGTGATGTGTGATGTCA   |
| rt-03g08754 F | CAATGCTTCTTACCCGCGA      |
| rt-03g08754 R | GTTTCCAGCCATCACTTGGAG    |
| rt-03g10210 F | CAAGTGGTTGCCATGGACTGA    |
| rt-03g10210 R | GCAGAAGACGCCAAAACATGT    |
| rt-03g11734 F | AATCCTCAGCGTTTTTGCTGGT   |
| rt-03g11734 R | TACGATCCCGATTACGAAGC     |
| rt-03g20910 F | TCCTAATGCAGAGCCTCCAAA    |
| rt-03g20910 R | GCATGCCTAAAAATGTGGTGC    |
| rt-03g29410 F | CCTCCTCAATGTCACCGATGA    |
| rt-03g29410 R | TTTTCCACCATCCCTCTCACC    |
| rt-03g46860 F | GCAAAACAGCAGAAATAGCGC    |
| rt-03g46860 R | TCAATGGCAACATGCCTGA      |
| rt-05g04490 F | GGCGAGCTTTGACAACCAGTA    |
| rt-05g04490 R | TTGCCCATCTTCACCATGG      |
| rt-05g06970 F | CCCAACACAACCGATGGAA      |
| rt-05g06970 R | ACCTGTTGTGCGAACTTGGTCG   |
| rt-05g20020 F | GACCTCAGATGCCGATGATCTA   |
| rt-05g20020 R | TCAGCTTTTAAAGTGAGGCATGC  |
| rt-06g11290 F | ATGGCACTTTCATCGCTGC      |
| rt-06g11290 R | CCTGTTCAATGGTGCGTCAA     |
| rt-06g44930 F | TGCCCCGACAAGTTTGGTTA     |
| rt-06g44930 R | CGATGACATTTTCGCGCAG      |
| rt-07g01410 F | TCGTGCTGCTCTTCTGATCGA    |
| rt-07g01410 R | ACGACGAAACGACGTACGAAC    |
| rt-07g05720 F | ACCCTTCAGTCCAATTCGCA     |
| rt-07g05720 R | GGCTGAAGAGGAACGGAATGT    |
| rt-07g34670 F | TCATTGGAGTAATGGCCCGTT    |
| rt-07g34670 R | ATGCCTGAATTTGGTGGCG      |
| rt-07g38170 F | GTGATGTGGTTGCTGTGTGGA    |
| rt-07g38170 R | TGTTCTGTCTGTCCCTCCCAA    |
| rt-07g48030 F | TGGTTTCATCAGCAAGTGCAC    |

|               |                        |
|---------------|------------------------|
| rt-07g48030 F | TCCGTAATCCTCATGCCTTTG  |
| rt-08g07180 F | AGTGACACAGATGAGAACCCGA |
| rt-08g07180 R | CAGTCCGGTCCCTATCATCTTT |
| rt-08g35210 F | TATGAAGAGCGTGATGCCAGG  |
| rt-08g35210 R | CCTTCCAGTTAGGCCTTGCAA  |
| rt-10g39680 F | GCGTCATCACCAACATCATCA  |
| rt-10g39680 R | CATGTTCGCAGTAGCGCTTGTA |
| rt-11g02130 F | GCCAGAGCACATTCTTTGCTG  |
| rt-11g02130 F | CTTCAATGGCGGAGCTACTGA  |
| rt-11g02130 R | TACTGGACATGCACACCGCTT  |
| rt-11g02130 R | TGATGTCCCCCATCTTGATCA  |
| rt-12g08130 F | GGAGCAGTAGAATCCTTGCAGG |
| rt-12g08130 R | CGCCAACCTCCATACAATCTG  |
| rt-12g41680 F | CTGCCTGAATTTGGCAGCTT   |
| rt-12g41680 R | AGCCATTTTCAGATGGAGGAGG |

---

**Supplemental Table 2. RNA-seq reads and analysis data of *wox11* mutant and wild type (HY)**

|                       |    | Raw reads | clean reads       | aligned concordantly exactly 1 time | aligned concordantly >1 times | Failed to align  |
|-----------------------|----|-----------|-------------------|-------------------------------------|-------------------------------|------------------|
| <i>wox11</i> mutant-1 | R1 | 43807682  | 43552504 (99.42%) | 24962963 (57.33%)                   | 14364134 (32.99%)             | 4215871 (9.68%)  |
|                       | R2 | 43807682  | 42196351 (96.32%) | 24110420 (57.15%)                   | 13869310 (32.88%)             | 4206741 (9.97%)  |
| <i>wox11</i> mutant-2 | R1 | 48983384  | 48769075 (99.56%) | 27772853 (56.96%)                   | 16162117 (33.15%)             | 4824987 (9.90%)  |
|                       | R2 | 48983384  | 47294787 (96.55%) | 26846126 (56.78%)                   | 15604675 (33.00%)             | 4833233 (10.22%) |
| HY-1                  | R1 | 48311766  | 48094639 (99.55%) | 27131557 (56.41%)                   | 16280434 (33.85%)             | 4681367 (9.73%)  |
|                       | R2 | 48311766  | 46733899 (96.73%) | 26126885 (55.91%)                   | 15691740 (33.58%)             | 4912233 (10.51%) |
| HY-2                  | R1 | 53406529  | 53122962 (99.47%) | 30245440 (56.94%)                   | 17395082 (32.75%)             | 5475829 (10.31%) |
|                       | R2 | 53406529  | 51948938 (97.27%) | 29474026 (56.74%)                   | 17024232 (32.77%)             | 5446943 (10.49%) |



**Supplemental Table 3. WOX11 binding motif number in the down- or up-regulated genes**

| Down-regulated<br>gene locus | promoter | gene-body | 5' - UTR | exon | 3' - UTR | intron |
|------------------------------|----------|-----------|----------|------|----------|--------|
| LOC_Os01g03330               | 1        | 0         | 0        | 0    | 0        | 0      |
| LOC_Os01g07480               | 1        | 1         | 0        | 1    | 0        | 0      |
| LOC_Os01g14550               | 1        | 0         | 0        | 0    | 0        | 0      |
| LOC_Os01g19694               | 0        | 1         | 0        | 0    | 0        | 1      |
| LOC_Os01g24420               | 0        | 2         | 0        | 1    | 0        | 1      |
| LOC_Os01g24550               | 0        | 1         | 0        | 1    | 0        | 0      |
| LOC_Os01g24560               | 0        | 1         | 0        | 0    | 1        | 0      |
| LOC_Os01g24600               | 0        | 1         | 0        | 0    | 0        | 1      |
| LOC_Os01g24700               | 1        | 1         | 0        | 0    | 0        | 1      |
| LOC_Os01g36590               | 0        | 2         | 0        | 0    | 0        | 2      |
| LOC_Os01g38229               | 0        | 7         | 0        | 0    | 0        | 7      |
| LOC_Os01g43774               | 2        | 2         | 0        | 0    | 0        | 2      |
| LOC_Os01g46760               | 1        | 2         | 0        | 0    | 0        | 2      |
| LOC_Os01g47070               | 1        | 1         | 0        | 0    | 1        | 0      |
| LOC_Os01g51860               | 0        | 1         | 0        | 1    | 0        | 0      |
| LOC_Os01g53130               | 0        | 1         | 0        | 0    | 1        | 0      |
| LOC_Os01g56420               | 1        | 0         | 0        | 0    | 0        | 0      |
| LOC_Os01g58240               | 0        | 4         | 0        | 1    | 0        | 3      |
| LOC_Os01g68720               | 1        | 0         | 0        | 0    | 0        | 0      |
| LOC_Os01g69010               | 1        | 0         | 0        | 0    | 0        | 0      |
| LOC_Os01g71820               | 0        | 1         | 0        | 0    | 1        | 0      |
| LOC_Os01g72740               | 0        | 1         | 0        | 0    | 0        | 1      |

|                |   |   |   |   |   |   |
|----------------|---|---|---|---|---|---|
| LOC_Os01g73840 | 1 | 2 | 0 | 1 | 0 | 1 |
| LOC_Os01g74110 | 0 | 1 | 0 | 0 | 0 | 1 |
| LOC_Os01g74340 | 1 | 0 | 0 | 0 | 0 | 0 |
| LOC_Os02g01890 | 1 | 0 | 0 | 0 | 0 | 0 |
| LOC_Os02g02400 | 1 | 1 | 0 | 0 | 0 | 1 |
| LOC_Os02g04230 | 0 | 1 | 0 | 0 | 0 | 1 |
| LOC_Os02g08490 | 0 | 4 | 0 | 2 | 0 | 2 |
| LOC_Os02g09690 | 0 | 3 | 0 | 0 | 0 | 3 |
| LOC_Os02g12080 | 0 | 1 | 0 | 0 | 1 | 0 |
| LOC_Os02g12350 | 0 | 2 | 0 | 1 | 0 | 1 |
| LOC_Os02g29150 | 0 | 1 | 0 | 0 | 0 | 1 |
| LOC_Os02g33820 | 1 | 0 | 0 | 0 | 0 | 0 |
| LOC_Os02g34190 | 1 | 0 | 0 | 0 | 0 | 0 |
| LOC_Os02g36590 | 1 | 2 | 0 | 0 | 1 | 1 |
| LOC_Os02g36595 | 1 | 1 | 0 | 0 | 0 | 1 |
| LOC_Os02g38392 | 0 | 5 | 0 | 1 | 0 | 4 |
| LOC_Os02g44200 | 1 | 0 | 0 | 0 | 0 | 0 |
| LOC_Os02g51680 | 0 | 1 | 0 | 0 | 0 | 1 |
| LOC_Os02g52340 | 0 | 1 | 0 | 0 | 0 | 1 |
| LOC_Os02g52930 | 0 | 1 | 0 | 0 | 0 | 1 |
| LOC_Os02g54140 | 2 | 0 | 0 | 0 | 0 | 0 |
| LOC_Os02g54180 | 1 | 0 | 0 | 0 | 0 | 0 |
| LOC_Os02g57490 | 1 | 1 | 0 | 0 | 1 | 0 |
| LOC_Os03g03034 | 0 | 3 | 0 | 0 | 0 | 3 |
| LOC_Os03g04070 | 0 | 1 | 0 | 0 | 0 | 1 |
| LOC_Os03g05334 | 1 | 0 | 0 | 0 | 0 | 0 |

|                |   |   |   |   |   |   |
|----------------|---|---|---|---|---|---|
| LOC_Os03g08754 | 0 | 3 | 0 | 0 | 0 | 3 |
| LOC_Os03g10210 | 0 | 1 | 0 | 0 | 0 | 1 |
| LOC_Os03g10640 | 0 | 3 | 0 | 0 | 1 | 2 |
| LOC_Os03g11734 | 0 | 6 | 0 | 0 | 0 | 6 |
| LOC_Os03g12950 | 0 | 2 | 1 | 0 | 1 | 0 |
| LOC_Os03g15370 | 1 | 0 | 0 | 0 | 0 | 0 |
| LOC_Os03g15890 | 0 | 1 | 0 | 0 | 0 | 1 |
| LOC_Os03g16920 | 0 | 1 | 0 | 0 | 1 | 0 |
| LOC_Os03g18850 | 3 | 0 | 0 | 0 | 0 | 0 |
| LOC_Os03g20120 | 1 | 0 | 0 | 0 | 0 | 0 |
| LOC_Os03g20420 | 0 | 2 | 0 | 0 | 0 | 2 |
| LOC_Os03g20910 | 0 | 1 | 0 | 1 | 0 | 0 |
| LOC_Os03g22590 | 1 | 5 | 0 | 3 | 0 | 2 |
| LOC_Os03g25030 | 1 | 1 | 0 | 0 | 0 | 1 |
| LOC_Os03g28300 | 0 | 2 | 0 | 1 | 0 | 1 |
| LOC_Os03g29410 | 4 | 1 | 0 | 0 | 0 | 1 |
| LOC_Os03g41170 | 0 | 1 | 0 | 0 | 0 | 1 |
| LOC_Os03g45970 | 0 | 2 | 0 | 0 | 0 | 2 |
| LOC_Os03g46860 | 0 | 3 | 0 | 1 | 0 | 2 |
| LOC_Os03g47860 | 1 | 0 | 0 | 0 | 0 | 0 |
| LOC_Os03g55050 | 0 | 1 | 0 | 1 | 0 | 0 |
| LOC_Os03g55080 | 1 | 1 | 0 | 0 | 0 | 1 |
| LOC_Os03g58190 | 1 | 1 | 0 | 1 | 0 | 0 |
| LOC_Os03g64100 | 1 | 0 | 0 | 0 | 0 | 0 |
| LOC_Os04g01690 | 1 | 1 | 0 | 0 | 0 | 1 |
| LOC_Os04g20200 | 0 | 1 | 0 | 0 | 0 | 1 |

|                |   |   |   |   |   |   |
|----------------|---|---|---|---|---|---|
| LOC_Os04g28210 | 0 | 1 | 0 | 0 | 0 | 1 |
| LOC_Os04g36740 | 0 | 1 | 0 | 1 | 0 | 0 |
| LOC_Os04g40990 | 0 | 1 | 0 | 1 | 0 | 0 |
| LOC_Os04g57130 | 0 | 1 | 1 | 0 | 0 | 0 |
| LOC_Os04g59020 | 0 | 2 | 0 | 0 | 2 | 0 |
| LOC_Os05g04490 | 1 | 0 | 0 | 0 | 0 | 0 |
| LOC_Os05g06970 | 1 | 0 | 0 | 0 | 0 | 0 |
| LOC_Os05g07710 | 0 | 1 | 0 | 0 | 0 | 1 |
| LOC_Os05g08750 | 2 | 1 | 1 | 0 | 0 | 0 |
| LOC_Os05g10370 | 1 | 0 | 0 | 0 | 0 | 0 |
| LOC_Os05g11428 | 0 | 3 | 0 | 1 | 0 | 2 |
| LOC_Os05g20020 | 0 | 1 | 0 | 0 | 1 | 0 |
| LOC_Os05g33644 | 1 | 1 | 0 | 0 | 0 | 1 |
| LOC_Os05g33700 | 1 | 0 | 0 | 0 | 0 | 0 |
| LOC_Os05g33710 | 0 | 2 | 0 | 0 | 0 | 2 |
| LOC_Os05g37880 | 0 | 2 | 0 | 1 | 1 | 0 |
| LOC_Os05g38120 | 0 | 3 | 0 | 0 | 0 | 3 |
| LOC_Os05g38270 | 0 | 2 | 0 | 1 | 0 | 1 |
| LOC_Os05g47690 | 1 | 1 | 0 | 0 | 0 | 1 |
| LOC_Os05g48570 | 1 | 0 | 0 | 0 | 0 | 0 |
| LOC_Os06g02210 | 0 | 2 | 0 | 1 | 1 | 0 |
| LOC_Os06g07200 | 0 | 1 | 0 | 0 | 0 | 1 |
| LOC_Os06g07300 | 0 | 1 | 0 | 0 | 0 | 1 |
| LOC_Os06g22150 | 2 | 0 | 0 | 0 | 0 | 0 |
| LOC_Os06g33100 | 0 | 1 | 0 | 0 | 1 | 0 |
| LOC_Os06g38750 | 0 | 1 | 0 | 0 | 0 | 1 |

|                |   |   |   |   |   |   |
|----------------|---|---|---|---|---|---|
| LOC_Os06g43860 | 1 | 1 | 0 | 0 | 0 | 1 |
| LOC_Os06g44610 | 2 | 1 | 0 | 0 | 0 | 1 |
| LOC_Os06g44930 | 1 | 0 | 0 | 0 | 0 | 0 |
| LOC_Os06g46340 | 0 | 2 | 0 | 0 | 0 | 2 |
| LOC_Os06g46350 | 1 | 0 | 0 | 0 | 0 | 0 |
| LOC_Os06g50830 | 1 | 0 | 0 | 0 | 0 | 0 |
| LOC_Os07g01410 | 0 | 1 | 0 | 0 | 0 | 1 |
| LOC_Os07g03910 | 1 | 0 | 0 | 0 | 0 | 0 |
| LOC_Os07g04450 | 0 | 2 | 0 | 0 | 0 | 2 |
| LOC_Os07g05720 | 0 | 1 | 0 | 0 | 0 | 1 |
| LOC_Os07g08000 | 0 | 1 | 0 | 1 | 0 | 0 |
| LOC_Os07g23430 | 0 | 2 | 0 | 0 | 2 | 0 |
| LOC_Os07g28890 | 1 | 0 | 0 | 0 | 0 | 0 |
| LOC_Os07g29600 | 1 | 3 | 1 | 0 | 0 | 2 |
| LOC_Os07g34670 | 1 | 0 | 0 | 0 | 0 | 0 |
| LOC_Os07g38170 | 1 | 0 | 0 | 0 | 0 | 0 |
| LOC_Os07g39070 | 0 | 3 | 0 | 0 | 0 | 3 |
| LOC_Os07g39210 | 0 | 1 | 0 | 1 | 0 | 0 |
| LOC_Os07g40240 | 1 | 1 | 1 | 0 | 0 | 0 |
| LOC_Os07g42160 | 1 | 0 | 0 | 0 | 0 | 0 |
| LOC_Os07g48020 | 0 | 1 | 0 | 1 | 0 | 0 |
| LOC_Os07g48030 | 1 | 1 | 0 | 1 | 0 | 0 |
| LOC_Os08g01030 | 0 | 2 | 0 | 1 | 0 | 1 |
| LOC_Os08g01510 | 1 | 0 | 0 | 0 | 0 | 0 |
| LOC_Os08g02200 | 2 | 0 | 0 | 0 | 0 | 0 |
| LOC_Os08g07180 | 1 | 0 | 0 | 0 | 0 | 0 |

|                |   |   |   |   |   |   |
|----------------|---|---|---|---|---|---|
| LOC_Os08g09300 | 0 | 1 | 0 | 0 | 1 | 0 |
| LOC_Os08g09690 | 0 | 3 | 0 | 1 | 0 | 2 |
| LOC_Os08g14860 | 0 | 2 | 0 | 0 | 0 | 2 |
| LOC_Os08g34280 | 1 | 2 | 0 | 0 | 0 | 2 |
| LOC_Os08g35210 | 0 | 3 | 0 | 0 | 1 | 2 |
| LOC_Os08g35948 | 0 | 2 | 0 | 1 | 0 | 1 |
| LOC_Os08g36860 | 0 | 4 | 0 | 1 | 0 | 3 |
| LOC_Os08g40680 | 1 | 0 | 0 | 0 | 0 | 0 |
| LOC_Os08g40940 | 0 | 2 | 0 | 1 | 0 | 1 |
| LOC_Os08g41880 | 1 | 0 | 0 | 0 | 0 | 0 |
| LOC_Os08g44180 | 0 | 1 | 0 | 0 | 0 | 1 |
| LOC_Os09g01290 | 0 | 1 | 0 | 0 | 0 | 1 |
| LOC_Os09g03630 | 0 | 1 | 0 | 0 | 0 | 1 |
| LOC_Os09g04995 | 0 | 1 | 1 | 0 | 0 | 0 |
| LOC_Os09g07440 | 0 | 3 | 0 | 0 | 0 | 3 |
| LOC_Os09g07450 | 0 | 2 | 0 | 0 | 0 | 2 |
| LOC_Os09g09570 | 0 | 1 | 0 | 1 | 0 | 0 |
| LOC_Os09g13650 | 1 | 0 | 0 | 0 | 0 | 0 |
| LOC_Os09g18010 | 0 | 3 | 0 | 0 | 0 | 3 |
| LOC_Os09g23140 | 1 | 1 | 0 | 1 | 0 | 0 |
| LOC_Os09g23150 | 0 | 1 | 0 | 0 | 0 | 1 |
| LOC_Os09g24490 | 0 | 1 | 0 | 1 | 0 | 0 |
| LOC_Os09g26500 | 0 | 1 | 0 | 0 | 0 | 1 |
| LOC_Os09g31482 | 1 | 0 | 0 | 0 | 0 | 0 |
| LOC_Os09g33740 | 0 | 1 | 0 | 0 | 0 | 1 |
| LOC_Os09g35860 | 1 | 0 | 0 | 0 | 0 | 0 |

|                |   |   |   |   |   |   |
|----------------|---|---|---|---|---|---|
| LOC_Os10g02300 | 0 | 2 | 0 | 1 | 1 | 0 |
| LOC_Os10g18820 | 0 | 1 | 0 | 1 | 0 | 0 |
| LOC_Os10g28020 | 2 | 1 | 0 | 0 | 0 | 1 |
| LOC_Os10g28030 | 1 | 1 | 0 | 0 | 0 | 1 |
| LOC_Os10g29650 | 0 | 1 | 0 | 1 | 0 | 0 |
| LOC_Os10g39640 | 0 | 1 | 0 | 0 | 1 | 0 |
| LOC_Os10g39680 | 1 | 0 | 0 | 0 | 0 | 0 |
| LOC_Os10g41060 | 0 | 2 | 0 | 0 | 2 | 0 |
| LOC_Os11g02130 | 1 | 0 | 0 | 0 | 0 | 0 |
| LOC_Os11g02570 | 1 | 1 | 0 | 1 | 0 | 0 |
| LOC_Os11g04409 | 0 | 1 | 1 | 0 | 0 | 0 |
| LOC_Os11g05800 | 2 | 0 | 0 | 0 | 0 | 0 |
| LOC_Os11g14570 | 0 | 1 | 0 | 0 | 1 | 0 |
| LOC_Os11g17504 | 0 | 1 | 0 | 1 | 0 | 0 |
| LOC_Os11g23930 | 1 | 0 | 0 | 0 | 0 | 0 |
| LOC_Os11g31050 | 0 | 2 | 0 | 1 | 0 | 1 |
| LOC_Os11g40590 | 1 | 4 | 1 | 1 | 0 | 2 |
| LOC_Os12g04340 | 1 | 0 | 0 | 0 | 0 | 0 |
| LOC_Os12g07310 | 0 | 1 | 0 | 0 | 1 | 0 |
| LOC_Os12g08090 | 0 | 1 | 0 | 0 | 0 | 1 |
| LOC_Os12g08130 | 0 | 1 | 0 | 1 | 0 | 0 |
| LOC_Os12g08760 | 0 | 4 | 0 | 0 | 0 | 4 |
| LOC_Os12g09540 | 0 | 1 | 0 | 0 | 0 | 1 |
| LOC_Os12g12590 | 0 | 1 | 0 | 0 | 0 | 1 |
| LOC_Os12g12600 | 1 | 3 | 0 | 0 | 0 | 3 |
| LOC_Os12g13720 | 0 | 5 | 0 | 1 | 0 | 4 |

| LOC_Os12g13730    | 1        | 0         | 0        | 0    | 0        | 0      |
|-------------------|----------|-----------|----------|------|----------|--------|
| LOC_Os12g28590    | 1        | 0         | 0        | 0    | 0        | 0      |
| LOC_Os12g36240    | 0        | 1         | 0        | 1    | 0        | 0      |
| LOC_Os12g39220    | 1        | 0         | 0        | 0    | 0        | 0      |
| LOC_Os12g41680    | 0        | 3         | 0        | 0    | 0        | 3      |
| LOC_Os12g42810    | 0        | 1         | 0        | 1    | 0        | 0      |
| Up-regulated gene |          |           |          |      |          |        |
| locus             | promoter | gene-body | 5' - UTR | exon | 3' - UTR | intron |
| LOC_Os11g31770    | 0        | 5         | 0        | 0    | 0        | 5      |
| LOC_Os11g24374    | 0        | 5         | 0        | 1    | 0        | 4      |
| LOC_Os06g16790    | 0        | 4         | 0        | 2    | 0        | 2      |
| LOC_Os09g25860    | 0        | 4         | 0        | 0    | 0        | 4      |
| LOC_Os02g58740    | 2        | 2         | 2        | 0    | 0        | 0      |
| LOC_Os12g10340    | 1        | 2         | 0        | 2    | 0        | 0      |
| LOC_Os03g22010    | 0        | 3         | 0        | 1    | 0        | 2      |
| LOC_Os03g21310    | 0        | 3         | 0        | 0    | 0        | 3      |
| LOC_Os11g34460    | 0        | 3         | 0        | 3    | 0        | 0      |
| LOC_Os04g38430    | 1        | 2         | 1        | 0    | 0        | 1      |
| LOC_Os02g05560    | 0        | 3         | 0        | 1    | 0        | 2      |
| LOC_Os01g64430    | 1        | 2         | 1        | 0    | 1        | 0      |
| LOC_Os03g09970    | 1        | 2         | 1        | 0    | 0        | 1      |
| LOC_Os04g02780    | 1        | 2         | 0        | 0    | 0        | 2      |
| LOC_Os01g15740    | 0        | 3         | 0        | 0    | 0        | 3      |
| LOC_Os05g26660    | 0        | 3         | 0        | 2    | 0        | 1      |
| LOC_Os03g53660    | 0        | 3         | 0        | 0    | 0        | 3      |
| LOC_Os05g39790    | 0        | 2         | 0        | 2    | 0        | 0      |



|                |   |   |   |   |   |   |
|----------------|---|---|---|---|---|---|
| LOC_Os12g38590 | 0 | 2 | 0 | 0 | 0 | 2 |
| LOC_Os03g53590 | 1 | 1 | 0 | 0 | 0 | 1 |
| LOC_Os07g03040 | 0 | 2 | 0 | 0 | 0 | 2 |
| LOC_Os10g40460 | 1 | 1 | 0 | 0 | 1 | 0 |
| LOC_Os01g37630 | 1 | 1 | 0 | 1 | 0 | 0 |
| LOC_Os04g55280 | 2 | 0 | 0 | 0 | 0 | 0 |
| LOC_Os04g04790 | 0 | 2 | 0 | 0 | 0 | 2 |
| LOC_Os04g04800 | 2 | 0 | 0 | 0 | 0 | 0 |
| LOC_Os09g37060 | 0 | 2 | 0 | 2 | 0 | 0 |
| LOC_Os01g22450 | 1 | 1 | 0 | 0 | 0 | 1 |
| LOC_Os12g39710 | 0 | 2 | 0 | 0 | 2 | 0 |
| LOC_Os11g43700 | 1 | 1 | 0 | 1 | 0 | 0 |
| LOC_Os12g17480 | 1 | 1 | 0 | 0 | 0 | 1 |
| LOC_Os01g49950 | 0 | 2 | 0 | 0 | 0 | 2 |
| LOC_Os04g39160 | 1 | 1 | 0 | 1 | 0 | 0 |
| LOC_Os07g13660 | 1 | 1 | 0 | 0 | 0 | 1 |
| LOC_Os01g62200 | 1 | 1 | 0 | 1 | 0 | 0 |
| LOC_Os01g16310 | 0 | 1 | 0 | 0 | 0 | 1 |
| LOC_Os04g38010 | 1 | 0 | 0 | 0 | 0 | 0 |
| LOC_Os02g27580 | 0 | 1 | 0 | 0 | 0 | 1 |
| LOC_Os07g32680 | 1 | 0 | 0 | 0 | 0 | 0 |
| LOC_Os10g07160 | 0 | 1 | 0 | 0 | 0 | 1 |
| LOC_Os10g37340 | 1 | 0 | 0 | 0 | 0 | 0 |
| LOC_Os01g61044 | 0 | 1 | 0 | 0 | 0 | 1 |
| LOC_Os10g41330 | 1 | 0 | 0 | 0 | 0 | 0 |
| LOC_Os02g21810 | 1 | 0 | 0 | 0 | 0 | 0 |

|                |   |   |   |   |   |   |
|----------------|---|---|---|---|---|---|
| LOC_Os09g37310 | 0 | 1 | 0 | 1 | 0 | 0 |
| LOC_Os01g35950 | 1 | 0 | 0 | 0 | 0 | 0 |
| LOC_Os04g23910 | 0 | 1 | 0 | 0 | 0 | 1 |
| LOC_Os05g30570 | 1 | 0 | 0 | 0 | 0 | 0 |
| LOC_Os10g38720 | 0 | 1 | 0 | 1 | 0 | 0 |
| LOC_Os06g11290 | 0 | 1 | 0 | 0 | 1 | 0 |
| LOC_Os01g54890 | 1 | 0 | 0 | 0 | 0 | 0 |
| LOC_Os03g44740 | 1 | 0 | 0 | 0 | 0 | 0 |
| LOC_Os03g05910 | 0 | 1 | 0 | 0 | 0 | 1 |
| LOC_Os10g31740 | 0 | 1 | 0 | 0 | 0 | 1 |
| LOC_Os06g29470 | 1 | 0 | 0 | 0 | 0 | 0 |
| LOC_Os03g43970 | 1 | 0 | 0 | 0 | 0 | 0 |
| LOC_Os05g34830 | 0 | 1 | 0 | 0 | 0 | 1 |
| LOC_Os09g38130 | 0 | 1 | 0 | 0 | 0 | 1 |
| LOC_Os01g41430 | 0 | 1 | 0 | 0 | 1 | 0 |
| LOC_Os01g50570 | 0 | 1 | 0 | 0 | 0 | 1 |
| LOC_Os01g57030 | 0 | 1 | 0 | 0 | 1 | 0 |
| LOC_Os09g23820 | 1 | 0 | 0 | 0 | 0 | 0 |
| LOC_Os07g44860 | 1 | 0 | 0 | 0 | 0 | 0 |
| LOC_Os05g42350 | 1 | 0 | 0 | 0 | 0 | 0 |
| LOC_Os03g37570 | 0 | 1 | 0 | 1 | 0 | 0 |
| LOC_Os09g34250 | 0 | 1 | 0 | 0 | 1 | 0 |
| LOC_Os01g47130 | 0 | 1 | 0 | 1 | 0 | 0 |
| LOC_Os01g14770 | 0 | 1 | 0 | 0 | 0 | 1 |
| LOC_Os01g70540 | 0 | 1 | 0 | 0 | 0 | 1 |
| LOC_Os08g18920 | 0 | 1 | 0 | 1 | 0 | 0 |

|                |   |   |   |   |   |   |
|----------------|---|---|---|---|---|---|
| LOC_Os05g40910 | 0 | 1 | 0 | 0 | 1 | 0 |
| LOC_Os01g50030 | 0 | 1 | 0 | 1 | 0 | 0 |
| LOC_Os01g50032 | 0 | 1 | 0 | 1 | 0 | 0 |
| LOC_Os01g53030 | 1 | 0 | 0 | 0 | 0 | 0 |
| LOC_Os04g14810 | 1 | 0 | 0 | 0 | 0 | 0 |
| LOC_Os10g31530 | 1 | 0 | 0 | 0 | 0 | 0 |
| LOC_Os04g46970 | 0 | 1 | 1 | 0 | 0 | 0 |
| LOC_Os05g44630 | 0 | 1 | 0 | 1 | 0 | 0 |
| LOC_Os04g57410 | 0 | 1 | 0 | 0 | 0 | 1 |
| LOC_Os03g08114 | 0 | 1 | 0 | 1 | 0 | 0 |
| LOC_Os06g17020 | 1 | 0 | 0 | 0 | 0 | 0 |
| LOC_Os07g33270 | 1 | 0 | 0 | 0 | 0 | 0 |
| LOC_Os08g14190 | 0 | 1 | 0 | 0 | 0 | 1 |
| LOC_Os08g08960 | 1 | 0 | 0 | 0 | 0 | 0 |
| LOC_Os08g27020 | 1 | 0 | 0 | 0 | 0 | 0 |
| LOC_Os10g27010 | 0 | 1 | 0 | 0 | 0 | 1 |
| LOC_Os10g42900 | 0 | 1 | 0 | 0 | 1 | 0 |
| LOC_Os12g07560 | 1 | 0 | 0 | 0 | 0 | 0 |
| LOC_Os01g50520 | 0 | 1 | 0 | 0 | 0 | 1 |
| LOC_Os12g24390 | 1 | 0 | 0 | 0 | 0 | 0 |
| LOC_Os01g61080 | 0 | 1 | 0 | 0 | 0 | 1 |
| LOC_Os01g64840 | 1 | 0 | 0 | 0 | 0 | 0 |
| LOC_Os02g41904 | 0 | 1 | 0 | 0 | 1 | 0 |

---

**Supplemental Table 4. Root-specific differentially expressed genes in *wax11* root tips**

| Down-regulated gene locus | With motif or not | Reported name    | annotation                                                 | Fold Change |
|---------------------------|-------------------|------------------|------------------------------------------------------------|-------------|
| LOC_Os09g24370            | N                 |                  | expressed protein                                          | 0.342509997 |
| LOC_Os07g01410            | Y                 |                  | peroxidase precursor, putative, expressed                  | 0.185568988 |
| LOC_Os01g24600            | Y                 |                  | fruit bromelain precursor, putative, expressed             | 0.35921611  |
| LOC_Os01g24550            | Y                 |                  | fruit bromelain precursor, putative, expressed             | 0.385998356 |
| LOC_Os11g20160            | N                 |                  | O-methyltransferase, putative, expressed                   | 0.499071297 |
| LOC_Os01g68720            | Y                 |                  | keratin, type I cytoskeletal 9, putative, expressed        | 0.489274347 |
| LOC_Os10g18820            | Y                 |                  | dirigent, putative, expressed                              | 0.154301735 |
| LOC_Os12g38010            | N                 |                  | metallothionein, putative, expressed                       | 0.493673353 |
| LOC_Os01g24560            | Y                 |                  | fruit bromelain precursor, putative, expressed             | 0.2514304   |
| LOC_Os01g68730            | N                 |                  | RNA-binding protein FUS, putative, expressed               | 0.400912353 |
| LOC_Os05g06970            | Y                 |                  | peroxidase precursor, putative, expressed                  | 0.294982852 |
| LOC_Os10g18760            | N                 |                  | dirigent, putative, expressed                              | 0.270145936 |
| LOC_Os03g25030            | Y                 |                  | GDSL-like lipase/acylhydrolase, putative, expressed        | 0.400225021 |
| LOC_Os06g32160            | N                 |                  | THION7 - Plant thionin family protein precursor, expressed | 0.063332729 |
| LOC_Os01g71380            | N                 |                  | glycosyl hydrolases family 17, putative, expressed         | 0.257565243 |
| LOC_Os07g23430            | Y                 |                  | fatty acid desaturase, putative, expressed                 | 0.385215317 |
| LOC_Os06g32990            | N                 |                  | peroxidase precursor, putative, expressed                  | 0.488877792 |
| LOC_Os11g14910            | N                 |                  | NADP-dependent oxidoreductase, putative, expressed         | 0.248550623 |
| LOC_Os02g17900            | N                 |                  | glycosyl hydrolases family 16, putative, expressed         | 0.47525169  |
| LOC_Os08g37250            | N                 | OspPLAII $\zeta$ | patatin, putative, expressed                               | 0.49281716  |
| LOC_Os01g51570            | N                 |                  | glycosyl hydrolases family 17, putative, expressed         | 0.472271566 |
| LOC_Os12g36240            | Y                 |                  | inhibitor I family protein, putative, expressed            | 0.395449071 |

|                |   |           |                                                                            |             |
|----------------|---|-----------|----------------------------------------------------------------------------|-------------|
| LOC_Os05g48740 | N |           | expressed protein                                                          | 0.363803983 |
| LOC_Os03g13160 | N |           | non-symbiotic hemoglobin 2, putative, expressed                            | 0.390754622 |
| LOC_Os03g20210 | N |           | aspartic proteinase nepenthesin precursor, putative, expressed             | 0.450749353 |
| LOC_Os10g39300 | N |           | aspartic proteinase nepenthesin, putative, expressed                       | 0.300368218 |
| LOC_Os03g25330 | N |           | peroxidase precursor, putative, expressed                                  | 0.446238292 |
| LOC_Os03g28300 | Y |           | protein kinase domain containing protein, expressed                        | 0.389472503 |
| LOC_Os01g60930 | N |           | expressed protein                                                          | 0.35206618  |
| LOC_Os01g15340 | N | OsRAA1    | flowering promoting factor-like 1, putative, expressed                     | 0.413244827 |
| LOC_Os08g24200 | N |           | expressed protein                                                          | 0.398815702 |
| LOC_Os03g52860 | N | L-2       | lipoxygenase, putative, expressed                                          | 0.48197727  |
| LOC_Os10g04800 | N | crl-2     | expressed protein                                                          | 0.419649385 |
| LOC_Os07g35560 | N |           | glucan endo-1,3-beta-glucosidase precursor, putative, expressed            | 0.205873564 |
| LOC_Os10g02300 | Y | OsPCR1    | uncharacterized Cys-rich domain containing protein, putative, expressed    | 0.260474533 |
|                |   | Asr2;ASR4 |                                                                            |             |
| LOC_Os01g72910 | N | ;OsASR6   | abscisic stress-ripening, putative, expressed                              | 0.263294913 |
| LOC_Os11g23930 | Y |           | expressed protein                                                          | 0.375912665 |
| LOC_Os08g36040 | N |           | plant viral response family protein, putative, expressed                   | 0.489243918 |
| LOC_Os03g20420 | Y |           | alpha-N-arabinofuranosidase A, putative, expressed                         | 0.315020213 |
| LOC_Os12g12600 | Y |           | dirigent, putative, expressed                                              | 0.125657234 |
| LOC_Os04g56420 | N |           | retrotransposon protein, putative, unclassified, expressed                 | 0.377045304 |
| LOC_Os05g04490 | Y |           | peroxidase precursor, putative, expressed                                  | 0.105474955 |
| LOC_Os11g44430 | N |           | protein kinase, putative, expressed                                        | 0.486694562 |
| LOC_Os08g07690 | N |           | expressed protein                                                          | 0.358977203 |
|                |   |           | Os9bglu29 - beta-glucosidase homologue, similar to Os4bglu12 exoglucanase, |             |
| LOC_Os09g31410 | N |           | expressed                                                                  | 0.228295532 |
| LOC_Os03g55050 | Y |           | UDP-glucuronosyl and UDP-glucosyl transferase domain containing protein,   | 0.491658655 |

|                |   |        |                                                                        |             |
|----------------|---|--------|------------------------------------------------------------------------|-------------|
|                |   |        | expressed                                                              |             |
| LOC_Os03g15080 | N |        | expressed protein                                                      | 0.299945638 |
| LOC_Os01g41240 | N |        | hydrolase, alpha/beta fold family domain containing protein, expressed | 0.150749123 |
| LOC_Os08g40940 | Y |        | expressed protein                                                      | 0.468252822 |
|                |   |        | BRASSINOSTEROID INSENSITIVE 1-associated receptor kinase 1             |             |
| LOC_Os06g16300 | N |        | precursor, putative, expressed                                         | 0.437705512 |
| LOC_Os02g12080 | Y |        | expressed protein                                                      | 0.343501403 |
| LOC_Os08g24300 | N |        | expressed protein                                                      | 0.139902935 |
| LOC_Os06g21820 | N |        | jasmonate O-methyltransferase, putative, expressed                     | 0.434170284 |
| LOC_Os11g47460 | N |        | MYB family transcription factor, putative, expressed                   | 0.475415759 |
| LOC_Os01g74110 | Y | OsZIP1 | metal cation transporter, putative, expressed                          | 0.282580373 |
| LOC_Os11g05800 | Y |        | HVA22, putative, expressed                                             | 0.396845485 |
| LOC_Os03g13210 | N |        | peroxidase precursor, putative, expressed                              | 0.305254715 |
| LOC_Os01g45140 | N |        | anthocyanin 3-O-beta-glucosyltransferase, putative, expressed          | 0.48896993  |
| LOC_Os11g12530 | N |        | receptor-like protein kinase 5 precursor, putative, expressed          | 0.471540762 |
| LOC_Os02g55890 | N | OVP3   | inorganic H <sup>+</sup> pyrophosphatase, putative, expressed          | 0.430109423 |
| LOC_Os03g58980 | N |        | Cupin domain containing protein, expressed                             | 0.285676865 |
| LOC_Os12g03740 | N |        | OsFBX438 - F-box domain containing protein, expressed                  | 0.258212005 |
|                |   |        | FAD-binding and arabino-lactone oxidase domains containing protein,    |             |
| LOC_Os08g40720 | N |        | putative, expressed                                                    | 0.083700058 |
| LOC_Os12g12590 | Y |        | NADP-dependent oxidoreductase, putative, expressed                     | 0.277788595 |
| LOC_Os06g21690 | N |        | expressed protein                                                      | 0.355436571 |
|                |   | Asr4;  |                                                                        |             |
|                |   | ASR6;  |                                                                        |             |
| LOC_Os04g34600 | N | OsASR2 | abscisic stress-ripening, putative, expressed                          | 0.321127399 |
| LOC_Os04g53860 | N |        | reductase, putative, expressed                                         | 0.36969427  |

|                |   |           |                                                                        |             |
|----------------|---|-----------|------------------------------------------------------------------------|-------------|
| LOC_Os07g48020 | Y |           | peroxidase precursor, putative, expressed                              | 0.401572019 |
| LOC_Os10g34040 | N |           | nodulin, putative, expressed                                           | 0.224737672 |
| LOC_Os03g29410 | Y |           | tyrosine protein kinase domain containing protein, putative, expressed | 0.495354851 |
| LOC_Os12g28590 | Y |           | ATPase 2, putative, expressed                                          | 0.261805397 |
| LOC_Os02g13510 | N |           | receptor-like protein kinase 5 precursor, putative, expressed          | 0.499087334 |
| LOC_Os01g72740 | Y |           | cytochrome P450, putative, expressed                                   | 0.351798543 |
|                |   |           | AGC_PVPK_like_CDK8.1 - ACG kinases include homologs to PKA, PKG        |             |
| LOC_Os09g31210 | N |           | and PKC, expressed                                                     | 0.491198638 |
| LOC_Os06g33100 | Y |           | peroxidase precursor, putative, expressed                              | 0.334132017 |
|                |   | OsGLP8-4; |                                                                        |             |
| LOC_Os08g08980 | N | GER1      | cupin domain containing protein, expressed                             | 0.424215963 |
| LOC_Os06g02210 | Y |           | bark storage protein A precursor, putative, expressed                  | 0.406119258 |
| LOC_Os06g03810 | N |           | expressed protein                                                      | 0.224382273 |
| LOC_Os12g09540 | Y |           | phosphoribosylamine--glycine ligase, putative, expressed               | 0.476745156 |
| LOC_Os01g71710 | N |           | amino acid permease family protein, putative, expressed                | 0.307302616 |
| LOC_Os01g56420 | Y | COPT1     | ctr copper transporter family protein, putative, expressed             | 0.369454023 |
|                |   |           | endonuclease/exonuclease/phosphatase family domain containing protein, |             |
| LOC_Os09g23140 | Y |           | expressed                                                              | 0.443954728 |
| LOC_Os01g38229 | Y |           | peptidyl-prolyl isomerase, putative, expressed                         | 0.385982278 |
| LOC_Os01g47070 | Y |           | glycosyl hydrolase, putative, expressed                                | 0.301164472 |
| LOC_Os01g74410 | N | OsMYB48   | MYB family transcription factor, putative, expressed                   | 0.355838371 |
|                |   |           | endonuclease/exonuclease/phosphatase family domain containing protein, |             |
| LOC_Os03g13520 | N |           | expressed                                                              | 0.367021277 |
| LOC_Os12g07310 | Y |           | citrate-binding protein precursor, putative, expressed                 | 0.172638022 |
| LOC_Os02g11770 | N |           | expressed protein                                                      | 0.423049409 |
| LOC_Os02g54180 | Y |           | expressed protein                                                      | 0.478094933 |

|                |   |          |                                                                          |             |
|----------------|---|----------|--------------------------------------------------------------------------|-------------|
| LOC_Os06g38750 | Y |          | proline-rich family protein, putative, expressed                         | 0.122927675 |
| LOC_Os08g40380 | N |          | sulfotransferase domain containing protein, expressed                    | 0.27043508  |
| LOC_Os03g18850 | Y | JIOsPR10 | pathogenesis-related Bet v I family protein, putative, expressed         | 0.420236206 |
| LOC_Os06g41740 | N |          | transposon protein, putative, CACTA, En/Spm sub-class, expressed         | 0.418029915 |
| LOC_Os06g49660 | N |          | transferase family protein, putative, expressed                          | 0.417976369 |
| LOC_Os01g71700 | N |          | amino acid permease family protein, putative, expressed                  | 0.344595805 |
| LOC_Os07g09310 | N |          | thioredoxin, putative, expressed                                         | 0.417586805 |
| LOC_Os02g57490 | Y |          | DUF260 domain containing protein, putative, expressed                    | 0.432726583 |
| LOC_Os06g36070 | N |          | expressed protein                                                        | 0.404300445 |
| LOC_Os03g44100 | N |          | phosphonate metabolism protein-related, putative, expressed              | 0.356672548 |
| LOC_Os12g39220 | Y |          | ZOS12-08 - C2H2 zinc finger protein, expressed                           | 0.475143816 |
| LOC_Os06g07300 | Y |          | jacalin-like lectin domain containing protein, expressed                 | 0.269973319 |
| LOC_Os04g57130 | Y |          | dirigent-like protein pDIR17, putative, expressed                        | 0.261671233 |
| LOC_Os07g44370 | N |          | dirigent, putative, expressed                                            | 0.269497336 |
| LOC_Os03g09980 | N |          | sulfate transporter, putative, expressed                                 | 0.407744659 |
| LOC_Os01g09700 | N | OsACS5   | aminotransferase, classes I and II, domain containing protein, expressed | 0.40881234  |
| LOC_Os04g01690 | Y |          | pyridoxal-dependent decarboxylase protein, putative, expressed           | 0.193768113 |
| LOC_Os03g12150 | N |          | serine/threonine-protein kinase receptor precursor, putative, expressed  | 0.27183457  |
| LOC_Os02g01890 | Y |          | cytochrome P450, putative, expressed                                     | 0.413000515 |
| LOC_Os02g52930 | Y |          | integral membrane protein DUF6 containing protein, expressed             | 0.44099295  |
|                |   | Asr3;    |                                                                          |             |
|                |   | OsASR3;  |                                                                          |             |
| LOC_Os02g33820 | Y | ASR1     | abscisic stress-ripening, putative, expressed                            | 0.318188813 |
| LOC_Os06g07200 | Y |          | syntaxin, putative, expressed                                            | 0.394200459 |
| LOC_Os12g36850 | N |          | pathogenesis-related Bet v I family protein, putative, expressed         | 0.192285712 |
| LOC_Os02g53750 | N |          | tyrosine protein kinase domain containing protein, putative, expressed   | 0.411225512 |



|                |   |         |                                                                         |             |
|----------------|---|---------|-------------------------------------------------------------------------|-------------|
| LOC_Os03g05334 | Y |         | expressed protein                                                       | 0.36417202  |
| LOC_Os11g05740 | N |         | B3 DNA binding domain containing protein, expressed                     | 0.314242907 |
| LOC_Os06g41930 | N |         | zinc-binding protein, putative, expressed                               | 0.433060016 |
| LOC_Os08g01480 | N |         | cytochrome P450, putative, expressed                                    | 0.360414723 |
| LOC_Os10g40490 | N |         | U-box domain containing protein, expressed                              | 0.459001311 |
| LOC_Os04g56390 | N |         | expressed protein                                                       | 0.267047598 |
| LOC_Os03g11734 | Y | OsFRDL1 | MATE efflux protein, putative, expressed                                | 0.308831076 |
| LOC_Os04g28210 | Y |         | verticillium wilt disease resistance protein, putative, expressed       | 0.493070263 |
| LOC_Os09g29820 | N | OsZIP73 | bZIP transcription factor domain containing protein, expressed          | 0.462192722 |
| LOC_Os07g34070 | N |         | auxin-induced protein 5NG4, putative, expressed                         | 0.242452648 |
| LOC_Os07g36544 | N |         | serine/threonine-protein kinase receptor precursor, putative, expressed | 0.446369489 |
| LOC_Os12g13730 | Y |         | pleiotropic drug resistance protein 2, putative, expressed              | 0.453994592 |
| LOC_Os01g43460 | N |         | C4-dicarboxylate transporter/malic acid transport protein, expressed    | 0.236786738 |
| LOC_Os06g09620 | N |         | expressed protein                                                       | 0.353845871 |
| LOC_Os03g08754 | Y | OsMDP1  | OsMADS47 - MADS-box family gene with MIKCC type-box, expressed          | 0.070232782 |
| LOC_Os09g26960 | N |         | cytochrome P450, putative, expressed                                    | 0.361678489 |
| LOC_Os01g38380 | N |         | plant protein of unknown function domain containing protein, expressed  | 0.49366994  |
| LOC_Os02g02400 | Y | OsCATA  | catalase isozyme A, putative, expressed                                 | 0.439709495 |
| LOC_Os03g10640 | Y |         | calcium-transporting ATPase, plasma membrane-type, putative, expressed  | 0.496519191 |
| LOC_Os01g58240 | Y |         | OsSub6 - Putative Subtilisin homologue, expressed                       | 0.468338229 |
| LOC_Os07g48030 | Y |         | peroxidase precursor, putative, expressed                               | 0.262527383 |
| LOC_Os05g50470 | N |         | expressed protein                                                       | 0.467422952 |
| LOC_Os02g52180 | N |         | plastocyanin-like domain containing protein, putative, expressed        | 0.47945222  |
| LOC_Os09g22510 | N |         | expressed protein                                                       | 0.435779073 |
| LOC_Os10g41060 | Y |         | expressed protein                                                       | 0.464558438 |
| LOC_Os05g10370 | Y |         | acid phosphatase, putative, expressed                                   | 0.42918221  |

|                |   |                                                                           |             |
|----------------|---|---------------------------------------------------------------------------|-------------|
| LOC_Os05g48210 | N | expressed protein                                                         | 0.427176644 |
| LOC_Os09g23780 | N | expressed protein                                                         | 0.360622131 |
| LOC_Os11g15250 | N | THION31 - Plant thionin family protein precursor, expressed               | 0.269894973 |
| LOC_Os04g56030 | N | glycine-rich cell wall structural protein precursor, putative, expressed  | 0.313196962 |
| LOC_Os01g03330 | Y | BBT13 - Bowman-Birk type bran trypsin inhibitor precursor, expressed      | 0.45124553  |
| LOC_Os12g04340 | Y | sulfotransferase domain containing protein, expressed                     | 0.335138828 |
| LOC_Os03g61490 | N | expressed protein                                                         | 0.244762899 |
| LOC_Os08g19650 | N | homeobox protein knotted-1, putative, expressed                           | 0.473045584 |
| LOC_Os05g50580 | N | OsSCP30 - Putative Serine Carboxypeptidase homologue, expressed           | 0.327392377 |
| LOC_Os03g36080 | N | expressed protein                                                         | 0.420856574 |
| LOC_Os05g51420 | N | hypersensitive-induced response protein, putative, expressed              | 0.482857749 |
|                |   | inosine-uridine preferring nucleoside hydrolase family protein, putative, |             |
| LOC_Os05g33644 | Y | expressed                                                                 | 0.414888212 |
| LOC_Os02g41460 | N | DUF640 domain containing protein, putative, expressed                     | 0.455300233 |
| LOC_Os01g43530 | N | late embryogenesis abundant protein, putative, expressed                  | 0.380156662 |
| LOC_Os02g43170 | N | B-box zinc finger family protein, putative, expressed                     | 0.158553428 |
| LOC_Os08g26850 | N | plant protein of unknown function domain containing protein, expressed    | 0.484978967 |
| LOC_Os08g02200 | Y | expressed protein                                                         | 0.346240883 |
| LOC_Os04g47810 | N | ethylene-responsive protein related, putative, expressed                  | 0.398608597 |
| LOC_Os09g18010 | Y | expressed protein                                                         | 0.451720863 |
| LOC_Os04g37490 | N | oxidoreductase, aldo/keto reductase family protein, putative, expressed   | 0.269339599 |
| LOC_Os12g37970 | N | MYB family transcription factor, putative, expressed                      | 0.405831919 |
| LOC_Os08g41880 | Y | nucleotide pyrophosphatase/phosphodiesterase, putative, expressed         | 0.318152696 |
| LOC_Os12g13720 | Y | Plant PDR ABC transporter associated domain containing protein, expressed | 0.453994592 |
| LOC_Os04g35660 | N | no apical meristem protein, putative, expressed                           | 0.471111153 |
| LOC_Os03g08320 | N | OsJAZ11; ZIM domain containing protein, putative, expressed               | 0.498108488 |

| LOC ID         | Expression | Gene      | Description                                                                     | Value       |
|----------------|------------|-----------|---------------------------------------------------------------------------------|-------------|
| LOC_Os01g14550 | Y          | OsTIFY11c | pathogen-related protein, putative, expressed                                   | 0.465559695 |
| LOC_Os05g05030 | N          |           | expressed protein                                                               | 0.369321827 |
| LOC_Os06g05020 | N          |           | early nodulin 93 ENOD93 protein, putative, expressed                            | 0.195117129 |
| LOC_Os12g28100 | N          |           | NBS-LRR disease resistance protein, putative, expressed                         | 0.43612464  |
| LOC_Os03g46860 | Y          |           | helix-loop-helix DNA-binding protein, putative, expressed                       | 0.275893404 |
| LOC_Os04g36740 | Y          |           | potassium channel SKOR, putative, expressed                                     | 0.298006609 |
| LOC_Os10g39680 | Y          |           | CHIT14 - Chitinase family protein precursor, expressed                          | 0.357746662 |
| LOC_Os07g38170 | Y          |           | remorin, putative, expressed                                                    | 0.457897977 |
| LOC_Os09g35860 | Y          |           | ras-related protein, putative, expressed                                        | 0.456420855 |
| LOC_Os06g47640 | N          | OsCML29   | OsCML29 - Calmodulin-related calcium sensor protein, expressed                  | 0.260457082 |
| LOC_Os12g08760 | Y          |           | carboxyvinyl-carboxyphosphonate phosphorylmutase, putative, expressed           | 0.340481014 |
| LOC_Os02g36590 | Y          |           | CPuORF19 - conserved peptide uORF-containing transcript, expressed              | 0.436599855 |
| LOC_Os04g45480 | N          |           | heat shock protein STI, putative, expressed                                     | 0.49564746  |
| LOC_Os11g04409 | Y          |           | expressed protein                                                               | 0.434444157 |
| LOC_Os03g12860 | N          |           | homeobox associated leucine zipper, putative, expressed                         | 0.325995558 |
| LOC_Os06g13210 | N          |           | peptide transporter PTR2, putative, expressed                                   | 0.308205262 |
| LOC_Os11g02570 | Y          |           | esterase, putative, expressed                                                   | 0.413320303 |
| LOC_Os11g02130 | Y          |           | peroxidase precursor, putative, expressed                                       | 0.463159657 |
| LOC_Os02g12350 | Y          |           | histone deacetylase, putative, expressed                                        | 0.497801011 |
| LOC_Os08g39150 | N          |           | expressed protein                                                               | 0.489791117 |
| LOC_Os08g08084 | N          |           | expressed protein                                                               | 0.249112186 |
| LOC_Os07g03910 | Y          |           | transporter, major facilitator superfamily domain containing protein, expressed | 0.478333439 |
| LOC_Os06g43860 | Y          |           | homeobox protein knotted-1, putative, expressed                                 | 0.468521287 |
| LOC_Os04g47310 | N          |           | expressed protein                                                               | 0.407047755 |
| LOC_Os11g35080 | N          |           | expressed protein                                                               | 0.374754222 |

|                |   |           |                                                               |             |
|----------------|---|-----------|---------------------------------------------------------------|-------------|
| LOC_Os05g08554 | N |           | expressed protein                                             | 0.40804297  |
|                |   | OsPht1;4; |                                                               |             |
| LOC_Os04g10750 | N | OsPT4     | inorganic phosphate transporter, putative, expressed          | 0.45276046  |
| LOC_Os03g15370 | Y | UbL402    | ubiquitin fusion protein, putative, expressed                 | 0.498563792 |
| LOC_Os01g64470 | N |           | harpin-induced protein 1 domain containing protein, expressed | 0.340824953 |
| LOC_Os08g01030 | Y | OsZIP16   | metal cation transporter, putative, expressed                 | 2.774297918 |
| LOC_Os04g59020 | Y |           | integral membrane protein, putative, expressed                | 0.475400405 |
| LOC_Os05g08900 | N |           | expressed protein                                             | 0.318599439 |
| LOC_Os09g35790 | N | OsHsfB2c  | HSF-type DNA-binding domain containing protein, expressed     | 0.338428351 |
| LOC_Os04g09390 | N |           | HEV3 - Hevein family protein precursor, expressed             | 0.397567114 |
| LOC_Os07g28890 | Y |           | ethylene-responsive protein related, putative, expressed      | 0.487047357 |

| UP-regulated gene locus | with motif or not | Reported name | annotation                                                                        | Fold Change |
|-------------------------|-------------------|---------------|-----------------------------------------------------------------------------------|-------------|
| LOC_Os10g31530          | N                 |               | glycine-rich cell wall protein, putative, expressed                               | 2.268908602 |
| LOC_Os04g11040          | N                 |               | expressed protein                                                                 | 2.489487112 |
| LOC_Os04g46810          | N                 |               | LTPL120 - Protease inhibitor/seed storage/LTP family protein precursor, expressed | 2.091987009 |
| LOC_Os06g16790          | N                 |               | go35 NBS-LRR, putative, expressed                                                 | 6.819676027 |
| LOC_Os12g24390          | N                 |               | retrotransposon protein, putative, unclassified, expressed                        | 2.053368983 |
| LOC_Os01g66900          | N                 |               | expressed protein                                                                 | 3.736083498 |
| LOC_Os01g64840          | N                 |               | aspartic proteinase nepenthesin-1 precursor, putative, expressed                  | 2.01725282  |
| LOC_Os10g31560          | N                 |               | glycine-rich cell wall structural protein 2 precursor, putative, expressed        | 3.734848164 |
|                         |                   | OsMADS2       |                                                                                   |             |
| LOC_Os04g23910          | N                 | 5             | OsMADS25 - MADS-box family gene with MIKCC type-box, expressed                    | 3.414605878 |
|                         |                   |               | LTPL143 - Protease inhibitor/seed storage/LTP family protein precursor, expressed |             |
| LOC_Os10g40480          | N                 |               | expressed                                                                         | 4.802608759 |

|                |   |            |                                                                                                 |             |
|----------------|---|------------|-------------------------------------------------------------------------------------------------|-------------|
| LOC_Os01g50520 | N |            | cytochrome P450 monooxygenase CYP711A12, putative, expressed                                    | 2.067258785 |
| LOC_Os10g03390 | N |            | transferase family protein, putative, expressed                                                 | 4.711394091 |
| LOC_Os12g24330 | N |            | expressed protein                                                                               | 2.431125279 |
| LOC_Os03g02939 | N |            | peroxidase precursor, putative, expressed                                                       | 2.040954183 |
| LOC_Os08g04350 | N |            | plastocyanin-like domain containing protein, putative, expressed                                | 2.456104207 |
| LOC_Os01g50580 | N | SLB2       | cytochrome P450, putative, expressed                                                            | 2.603583291 |
| LOC_Os04g38430 | N |            | nodulin, putative, expressed                                                                    | 2.685580155 |
| LOC_Os08g01950 | N |            | transferase family protein, putative, expressed                                                 | 2.002874378 |
| LOC_Os01g03890 | N |            | DUF260 domain containing protein, putative, expressed                                           | 2.673601202 |
| LOC_Os03g44170 | N |            | glutathione S-transferase, putative, expressed                                                  | 6.333681991 |
| LOC_Os03g09970 | N |            | sulfate transporter, putative, expressed                                                        | 2.116968901 |
| LOC_Os10g40470 | N |            | LTPL142 - Protease inhibitor/seed storage/LTP family protein precursor, putative, expressed     | 7.866752047 |
| LOC_Os06g08120 | N |            | plant protein of unknown function domain containing protein, expressed                          | 2.476467038 |
| LOC_Os10g38720 | N |            | glutathione S-transferase, putative, expressed                                                  | 3.137664084 |
| LOC_Os06g17020 | N |            | anthocyanin 3-O-beta-glucosyltransferase, putative, expressed                                   | 2.191963274 |
| LOC_Os02g43410 | N | OsYSL15    | transposon protein, putative, unclassified, expressed                                           | 2.931416641 |
| LOC_Os09g20220 | N |            | glutathione S-transferase, putative, expressed                                                  | 2.515866858 |
| LOC_Os07g48060 | N |            | peroxidase precursor, putative, expressed                                                       | 9.229173817 |
| LOC_Os10g31780 | N |            | oxidoreductase, short chain dehydrogenase/reductase family domain containing protein, expressed | 4.147933645 |
| LOC_Os03g07510 | N | PGL1       | expressed protein                                                                               | 2.523217775 |
| LOC_Os08g13980 | N |            | glycosyl hydrolases family 16, putative, expressed                                              | 2.793279961 |
| LOC_Os06g21950 | N | OsPht1;10; |                                                                                                 |             |
| LOC_Os12g10340 | N | OsPT10     | inorganic phosphate transporter, putative, expressed                                            | 2.615991719 |
|                |   |            | NBS-LRR type resistance protein, putative, expressed                                            | 12.37034996 |

|                |   |          |                                                                                             |             |
|----------------|---|----------|---------------------------------------------------------------------------------------------|-------------|
| LOC_Os11g41850 | N |          | transporter family protein, putative, expressed                                             | 2.50620903  |
| LOC_Os11g10290 | N |          | S-domain receptor-like protein kinase, putative, expressed                                  | 2.087155702 |
| LOC_Os06g29470 | N |          | peroxidase precursor, putative, expressed                                                   | 2.836297865 |
| LOC_Os05g13900 | N | RePRP1.2 | retrotransposon protein, putative, unclassified, expressed                                  | 2.859626047 |
| LOC_Os04g52780 | N | OsFLS2   | leucine-rich repeat receptor protein kinase EXS precursor, putative, expressed              | 2.155335351 |
| LOC_Os01g41430 | N |          | UDP-glucuronosyl and UDP-glucosyl transferase, putative, expressed                          | 2.605496678 |
| LOC_Os02g33780 | N |          | serine-aspartate repeat-containing protein I precursor, putative, expressed                 | 2.095951734 |
| LOC_Os02g39330 | N |          | CHIT1 - Chitinase family protein precursor, expressed                                       | 2.194432709 |
| LOC_Os01g20950 | N |          | sulfotransferase domain containing protein, expressed                                       | 3.631818807 |
| LOC_Os10g36980 | N |          | transposon protein, putative, unclassified, expressed                                       | 2.064299512 |
| LOC_Os02g42640 | N |          | CBS domain-containing protein, putative, expressed                                          | 2.813497554 |
| LOC_Os07g38840 | N |          | expressed protein                                                                           | 2.323954698 |
| LOC_Os01g54890 | N | OsERF922 | ethylene-responsive transcription factor 2, putative, expressed                             | 3.101763021 |
| LOC_Os01g50570 | N |          | cytochrome P450 monooxygenase CYP711A12, putative, expressed                                | 2.603583291 |
| LOC_Os07g23570 | N |          | cytochrome P450 72A1, putative, expressed                                                   | 2.794491382 |
| LOC_Os04g38360 | N |          | wound/stress protein, putative, expressed                                                   | 6.223558757 |
| LOC_Os01g43890 | N |          | OsSCP4 - Putative Serine Carboxypeptidase homologue, expressed                              | 2.104385548 |
| LOC_Os05g27580 | N |          | wound-induced protein WI12, putative, expressed                                             | 2.297068722 |
| LOC_Os02g36300 | N |          | zinc finger, C3HC4 type domain containing protein, expressed                                | 2.815405937 |
| LOC_Os04g46820 | N |          | LTPL121 - Protease inhibitor/seed storage/LTP family protein precursor, putative, expressed | 2.583613475 |
| LOC_Os01g70540 | N |          | retrotransposon protein, putative, unclassified, expressed                                  | 2.395987989 |
| LOC_Os02g25780 | N |          | expressed protein                                                                           | 2.107541107 |
| LOC_Os01g70970 | N |          | protein kinase, putative, expressed                                                         | 3.791315945 |
| LOC_Os01g64540 | N |          | anthocyanidin 3-O-glucosyltransferase, putative, expressed                                  | 3.901681652 |
| LOC_Os03g62330 | N |          | expressed protein                                                                           | 2.637671537 |

|                |   |         |                                                                    |             |
|----------------|---|---------|--------------------------------------------------------------------|-------------|
| LOC_Os10g21670 | N |         | dehydration stress-induced protein, putative, expressed            | 3.622301067 |
| LOC_Os01g16310 | N |         | glycosyl hydrolase, family 31, putative, expressed                 | 16.34506158 |
| LOC_Os06g04850 | N |         | homeobox associated leucine zipper, putative, expressed            | 2.008641669 |
| LOC_Os03g43970 | N |         | amino acid permease family protein, putative, expressed            | 2.810957121 |
| LOC_Os10g19200 | N |         | vegetative cell wall protein gp1 precursor, putative, expressed    | 2.285761681 |
| LOC_Os07g44860 | N |         | gibberellin receptor GID1L2, putative, expressed                   | 2.467614394 |
|                |   | OsWRKY2 |                                                                    |             |
| LOC_Os01g61080 | N | 4       | WRKY24, expressed                                                  | 2.019287674 |
| LOC_Os05g12580 | N |         | expressed protein                                                  | 2.235256925 |
| LOC_Os11g24374 | N |         | OsSCP55 - Putative Serine Carboxypeptidase homologue, expressed    | 2.208265249 |
| LOC_Os01g50030 | N |         | CPuORF25 - conserved peptide uORF-containing transcript, expressed | 2.372254085 |
| LOC_Os06g11290 | N | OsOPR1  | 12-oxophytodienoate reductase, putative, expressed                 | 3.124698233 |

---

**Supplemental Table 5. Cytokinin-inducible genes regulated by *WOX11***

| Down-regulated gene locus | With motif or not | Annotation                                                                       | Fold Change |
|---------------------------|-------------------|----------------------------------------------------------------------------------|-------------|
| LOC_Os01g03330            | Y                 | BBT13 - Bowman-Birk type bran trypsin inhibitor precursor, expressed             | 0.451       |
| LOC_Os01g04330            | N                 | OscML16 - Calmodulin-related calcium sensor protein, expressed                   | 0.492       |
| LOC_Os01g09700            | N                 | aminotransferase, classes I and II, domain containing protein, expressed         | 0.409       |
| LOC_Os01g24600            | Y                 | fruit bromelain precursor, putative, expressed                                   | 0.359       |
| LOC_Os01g38229            | Y                 | peptidyl-prolyl isomerase, putative, expressed                                   | 0.386       |
| LOC_Os01g47070            | Y                 | glycosyl hydrolase, putative, expressed                                          | 0.301       |
| LOC_Os01g51570            | N                 | glycosyl hydrolases family 17, putative, expressed                               | 0.472       |
| LOC_Os01g71710            | N                 | amino acid permease family protein, putative, expressed                          | 0.307       |
| LOC_Os02g12080            | Y                 | expressed protein                                                                | 0.344       |
| LOC_Os02g13510            | N                 | receptor-like protein kinase 5 precursor, putative, expressed                    | 0.499       |
| LOC_Os02g43170            | N                 | B-box zinc finger family protein, putative, expressed                            | 0.159       |
| LOC_Os02g52180            | N                 | plastocyanin-like domain containing protein, putative, expressed                 | 0.479       |
| LOC_Os03g03034            | Y                 | flavonol synthase/flavanone 3-hydroxylase, putative, expressed                   | 0.330       |
| LOC_Os03g08320            | N                 | ZIM domain containing protein, putative, expressed                               | 0.498       |
| LOC_Os03g09980            | N                 | sulfate transporter, putative, expressed                                         | 0.408       |
| LOC_Os03g10210            | Y                 | homeobox domain containing protein, expressed                                    | 0.353       |
| LOC_Os03g13520            | N                 | endonuclease/exonuclease/phosphatase family domain containing protein, expressed | 0.367       |
| LOC_Os03g19670            | N                 | GDSL-like lipase/acylhydrolase, putative, expressed                              | 0.449       |
| LOC_Os03g20120            | Y                 | glycosyl transferase 8 domain containing protein, putative, expressed            | 0.309       |
| LOC_Os03g22200            | N                 | nodulin MtN3 family protein, putative, expressed                                 | 0.318       |
| LOC_Os03g46860            | Y                 | helix-loop-helix DNA-binding protein, putative, expressed                        | 0.276       |



|                |   |                                                                                   |       |
|----------------|---|-----------------------------------------------------------------------------------|-------|
| LOC_Os03g49350 | N | lipoxygenase protein, putative, expressed                                         | 0.470 |
| LOC_Os04g01690 | Y | pyridoxal-dependent decarboxylase protein, putative, expressed                    | 0.194 |
| LOC_Os04g10750 | N | inorganic phosphate transporter, putative, expressed                              | 0.453 |
| LOC_Os04g34600 | N | abscisic stress-ripening, putative, expressed                                     | 0.321 |
| LOC_Os04g45270 | N | aspartyl protease family protein, putative, expressed                             | 0.439 |
| LOC_Os04g56950 | N | jasmonate O-methyltransferase, putative, expressed                                | 0.385 |
| LOC_Os05g05060 | N | expressed protein                                                                 | 0.372 |
| LOC_Os05g10370 | Y | acid phosphatase, putative, expressed                                             | 0.429 |
| LOC_Os05g28520 | N | MRH1, putative, expressed                                                         | 0.484 |
| LOC_Os06g03810 | N | expressed protein                                                                 | 0.224 |
| LOC_Os06g11650 | N | phosphate-induced protein 1 conserved region domain containing protein, expressed | 0.464 |
| LOC_Os06g32160 | N | THION7 - Plant thionin family protein precursor, expressed                        | 0.063 |
| LOC_Os06g32990 | N | peroxidase precursor, putative, expressed                                         | 0.489 |
| LOC_Os06g41740 | N | transposon protein, putative, CACTA, En/Spm sub-class, expressed                  | 0.418 |
| LOC_Os06g44930 | Y | expressed protein                                                                 | 0.466 |
| LOC_Os06g49660 | N | transferase family protein, putative, expressed                                   | 0.418 |
| LOC_Os07g23430 | Y | fatty acid desaturase, putative, expressed                                        | 0.385 |
| LOC_Os07g38170 | Y | remorin, putative, expressed                                                      | 0.458 |
| LOC_Os07g39880 | N | retrotransposon, putative, centromere-specific, expressed                         | 0.490 |
| LOC_Os08g07180 | Y | cytokinin-O-glucosyltransferase 2, putative, expressed                            | 0.454 |
| LOC_Os08g34280 | Y | cinnamoyl-CoA reductase, putative, expressed                                      | 0.466 |
| LOC_Os08g34984 | N | DUF581 domain containing protein, expressed                                       | 0.353 |
| LOC_Os08g35210 | Y | ferric reductase, putative, expressed                                             | 0.435 |
| LOC_Os08g41880 | Y | nucleotide pyrophosphatase/phosphodiesterase, putative, expressed                 | 0.318 |
| LOC_Os09g23140 | Y | endonuclease/exonuclease/phosphatase family domain containing protein, expressed  | 0.444 |

|                |   |                                                                            |       |
|----------------|---|----------------------------------------------------------------------------|-------|
| LOC_Os09g24370 | N | expressed protein                                                          | 0.343 |
| LOC_Os09g28210 | N | bHelix-loop-helix transcription factor, putative, expressed                | 0.255 |
| LOC_Os09g31430 | N | Os9bglu30 - beta-glucosidase, similar to Os4bglu12 exoglucanase, expressed | 0.417 |
| LOC_Os10g39680 | Y | CHIT14 - Chitinase family protein precursor, expressed                     | 0.358 |
| LOC_Os11g02130 | Y | peroxidase precursor, putative, expressed                                  | 0.463 |
| LOC_Os11g04409 | Y | expressed protein                                                          | 0.434 |
| LOC_Os11g05740 | N | B3 DNA binding domain containing protein, expressed                        | 0.314 |
| LOC_Os11g12530 | N | receptor-like protein kinase 5 precursor, putative, expressed              | 0.472 |
| LOC_Os11g20160 | N | O-methyltransferase, putative, expressed                                   | 0.499 |
| LOC_Os12g08090 | Y | amino acid transporter, putative, expressed                                | 0.329 |
| LOC_Os12g08130 | Y | amino acid transporter, putative, expressed                                | 0.248 |
| LOC_Os12g36240 | Y | inhibitor I family protein, putative, expressed                            | 0.395 |

| Up-regulated gene locus | With motif or not | Annotation                                                                        | Fold Change |
|-------------------------|-------------------|-----------------------------------------------------------------------------------|-------------|
| LOC_Os01g50030          | Y                 | CPuORF25 - conserved peptide uORF-containing transcript, expressed                | 2.372       |
| LOC_Os01g74020          | N                 | MYB family transcription factor, putative, expressed                              | 2.650       |
| LOC_Os06g10100          | N                 | expressed protein                                                                 | 2.122       |
| LOC_Os10g03390          | N                 | transferase family protein, putative, expressed                                   | 4.711       |
| LOC_Os10g37340          | Y                 | cystathionine gamma-synthase, putative, expressed                                 | 6.008       |
| LOC_Os10g40480          | N                 | LTPL143 - Protease inhibitor/seed storage/LTP family protein precursor, expressed | 4.803       |
| LOC_Os11g31770          | Y                 | expressed protein                                                                 | 2.734       |

**Supplemental Table 6. Stress related differentially expressed genes**

| Down-regulated gene locus | With motif or not | Annotation                                                                | Fold change |
|---------------------------|-------------------|---------------------------------------------------------------------------|-------------|
| LOC_Os06g32160            | N                 | THION7 - Plant thionin family protein precursor, expressed                | 0.063333    |
| LOC_Os05g04490            | Y                 | peroxidase precursor, putative, expressed                                 | 0.105476    |
| LOC_Os03g22590            | Y                 | nodulin MtN3 family protein, putative, expressed                          | 0.111777    |
| LOC_Os12g12600            | Y                 | dirigent, putative, expressed                                             | 0.125658    |
| LOC_Os10g18820            | N                 | dirigent, putative, expressed                                             | 0.154301    |
| LOC_Os09g27820            | N                 | 1-aminocyclopropane-1-carboxylate oxidase protein, putative, expressed    | 0.156338    |
| LOC_Os07g01410            | N                 | peroxidase precursor, putative, expressed                                 | 0.185569    |
| LOC_Os04g01690            | Y                 | pyridoxal-dependent decarboxylase protein, putative, expressed            | 0.193768    |
| LOC_Os06g14240            | N                 | hsp20/alpha crystallin family protein, putative, expressed                | 0.212333    |
| LOC_Os08g16910            | N                 | dehydrogenase, putative, expressed                                        | 0.212657    |
| LOC_Os10g34040            | N                 | nodulin, putative, expressed                                              | 0.224737    |
| LOC_Os01g71380            | N                 | glycosyl hydrolases family 17, putative, expressed                        | 0.257565    |
| LOC_Os10g02300            | N                 | uncharacterized Cys-rich domain containing protein, putative, expressed   | 0.260474    |
| LOC_Os04g57130            | N                 | dirigent-like protein pDIR17, putative, expressed                         | 0.261672    |
| LOC_Os07g48030            | Y                 | peroxidase precursor, putative, expressed                                 | 0.262527    |
| LOC_Os01g72910            | N                 | abscisic stress-ripening, putative, expressed                             | 0.263295    |
| LOC_Os11g28470            | N                 | expressed protein                                                         | 0.265527    |
| LOC_Os04g37490            | N                 | oxidoreductase, aldo/keto reductase family protein, putative, expressed   | 0.269338    |
| LOC_Os07g44370            | N                 | dirigent, putative, expressed                                             | 0.269497    |
| LOC_Os10g18760            | N                 | dirigent, putative, expressed                                             | 0.270146    |
| LOC_Os09g01290            | N                 | hhH-GPD superfamily base excision DNA repair protein, putative, expressed | 0.270716    |

|                |   |                                                                       |          |
|----------------|---|-----------------------------------------------------------------------|----------|
| LOC_Os03g15960 | N | hsp20/alpha crystallin family protein, putative, expressed            | 0.275765 |
| LOC_Os05g06970 | Y | peroxidase precursor, putative, expressed                             | 0.294982 |
| LOC_Os01g47070 | Y | glycosyl hydrolase, putative, expressed                               | 0.301166 |
| LOC_Os03g13210 | N | peroxidase precursor, putative, expressed                             | 0.305256 |
| LOC_Os05g07710 | N | WD40-like domain containing protein, putative, expressed              | 0.305635 |
| LOC_Os06g13210 | N | peptide transporter PTR2, putative, expressed                         | 0.308205 |
| LOC_Os03g20120 | Y | glycosyl transferase 8 domain containing protein, putative, expressed | 0.30899  |
| LOC_Os03g03910 | N | catalase domain containing protein, expressed                         | 0.312743 |
| LOC_Os04g01740 | N | heat shock protein, putative, expressed                               | 0.313166 |
| LOC_Os09g31482 | Y | splicing factor U2AF, putative, expressed                             | 0.314875 |
| LOC_Os02g33820 | N | abscisic stress-ripening, putative, expressed                         | 0.31819  |
| LOC_Os07g05720 | Y | TCP family transcription factor, putative, expressed                  | 0.214914 |
| LOC_Os03g10210 | Y | homeobox domain containing protein, expressed                         | 0.353078 |
| LOC_Os04g34600 | N | abscisic stress-ripening, putative, expressed                         | 0.321128 |
| LOC_Os03g47810 | N | nodulin family protein, putative, expressed                           | 0.325775 |
| LOC_Os03g03034 | N | flavonol synthase/flavanone 3-hydroxylase, putative, expressed        | 0.329728 |
| LOC_Os06g33100 | N | peroxidase precursor, putative, expressed                             | 0.334134 |
| LOC_Os12g04340 | Y | sulfotransferase domain containing protein, expressed                 | 0.335141 |
| LOC_Os01g64470 | N | harpin-induced protein 1 domain containing protein, expressed         | 0.340824 |
| LOC_Os10g39680 | Y | CHIT14 - Chitinase family protein precursor, expressed                | 0.357747 |
| LOC_Os01g24600 | N | fruit bromelain precursor, putative, expressed                        | 0.359215 |
| LOC_Os09g26960 | N | cytochrome P450, putative, expressed                                  | 0.361679 |
| LOC_Os09g35800 | N | UDP-glucose 4-epimerase, putative, expressed                          | 0.373528 |
| LOC_Os01g46760 | Y | protein phosphatase 2C, putative, expressed                           | 0.376552 |
| LOC_Os01g43530 | N | late embryogenesis abundant protein, putative, expressed              | 0.380158 |

|                |   |                                                                                           |          |
|----------------|---|-------------------------------------------------------------------------------------------|----------|
| LOC_Os10g33170 | N | POT domain containing peptide transporter, putative, expressed                            | 0.384869 |
| LOC_Os01g24550 | N | fruit bromelain precursor, putative, expressed                                            | 0.385997 |
| LOC_Os03g13160 | N | non-symbiotic hemoglobin 2, putative, expressed                                           | 0.390756 |
| LOC_Os12g36240 | N | inhibitor I family protein, putative, expressed                                           | 0.395448 |
| LOC_Os07g48020 | N | peroxidase precursor, putative, expressed                                                 | 0.401572 |
| LOC_Os03g09980 | N | sulfate transporter, putative, expressed                                                  | 0.407745 |
| LOC_Os02g53750 | N | tyrosine protein kinase domain containing protein, putative, expressed                    | 0.411225 |
| LOC_Os05g33644 | Y | inosine-uridine preferring nucleoside hydrolase family protein, putative, expressed       | 0.414887 |
| LOC_Os03g14180 | N | hsp20/alpha crystallin family protein, putative, expressed                                | 0.42011  |
| LOC_Os07g34670 | Y | peroxidase precursor, putative, expressed                                                 | 0.427214 |
| LOC_Os08g40680 | Y | glycosyl hydrolase, putative, expressed                                                   | 0.427258 |
| LOC_Os02g55890 | N | inorganic H <sup>+</sup> pyrophosphatase, putative, expressed                             | 0.430111 |
| LOC_Os08g35210 | N | ferric reductase, putative, expressed                                                     | 0.435499 |
| LOC_Os12g28100 | N | NBS-LRR disease resistance protein, putative, expressed                                   | 0.436127 |
| LOC_Os02g08490 | N | chaperone protein clpB 1, putative, expressed                                             | 0.436529 |
| LOC_Os06g16300 | N | BRASSINOSTEROID INSENSITIVE 1-associated receptor kinase 1 precursor, putative, expressed | 0.437705 |
| LOC_Os02g02400 | Y | catalase isozyme A, putative, expressed                                                   | 0.439712 |
| LOC_Os04g41980 | N | ATOZI1, putative, expressed                                                               | 0.440355 |
| LOC_Os01g71820 | N | glycosyl hydrolases family 17, putative, expressed                                        | 0.441079 |
| LOC_Os11g02080 | N | expressed protein                                                                         | 0.44148  |
| LOC_Os03g25330 | N | peroxidase precursor, putative, expressed                                                 | 0.446236 |
| LOC_Os12g02040 | N | hypoxia-responsive family protein, putative, expressed                                    | 0.458794 |
| LOC_Os02g54140 | N | hsp20/alpha crystallin family protein, putative, expressed                                | 0.462171 |
| LOC_Os11g02130 | Y | peroxidase precursor, putative, expressed                                                 | 0.463159 |
| LOC_Os08g34280 | Y | cinnamoyl-CoA reductase, putative, expressed                                              | 0.465596 |

| LOC_Os09g07450          | N                 | flavonol synthase, putative, expressed                                                      | 0.468448    |
|-------------------------|-------------------|---------------------------------------------------------------------------------------------|-------------|
| LOC_Os12g42810          | N                 | mov34/MPN/PAD-1 family protein, expressed                                                   | 0.469713    |
| LOC_Os01g51570          | N                 | glycosyl hydrolases family 17, putative, expressed                                          | 0.472272    |
| LOC_Os11g07690          | N                 | dirigent, putative, expressed                                                               | 0.472773    |
| LOC_Os02g38392          | N                 | NBS-LRR disease resistance protein, putative, expressed                                     | 0.472865    |
| LOC_Os03g55530          | N                 | HLS, putative, expressed                                                                    | 0.478536    |
| LOC_Os11g02440          | N                 | chalcone--flavonone isomerase, putative, expressed                                          | 0.480264    |
| LOC_Os03g52860          | N                 | lipoxygenase, putative, expressed                                                           | 0.481978    |
| LOC_Os04g41410          | N                 | expressed protein                                                                           | 0.48684     |
| LOC_Os06g32990          | N                 | peroxidase precursor, putative, expressed                                                   | 0.488876    |
| LOC_Os01g45140          | N                 | anthocyanin 3-O-beta-glucosyltransferase, putative, expressed                               | 0.488971    |
| LOC_Os01g04330          | N                 | OsCML16 - Calmodulin-related calcium sensor protein, expressed                              | 0.492362    |
| LOC_Os08g37250          | N                 | patatin, putative, expressed                                                                | 0.492819    |
| LOC_Os04g28210          | N                 | verticillium wilt disease resistance protein, putative, expressed                           | 0.493072    |
| LOC_Os12g41680          | Y                 | No apical meristem protein, putative, expressed                                             | 0.402189    |
| LOC_Os03g29410          | Y                 | tyrosine protein kinase domain containing protein, putative, expressed                      | 0.495353    |
| LOC_Os04g45480          | N                 | heat shock protein STI, putative, expressed                                                 | 0.495649    |
| LOC_Os03g44380          | N                 | 9-cis-epoxycarotenoid dioxygenase 1, chloroplast precursor, putative, expressed             | 0.497156    |
| LOC_Os03g08320          | N                 | ZIM domain containing protein, putative, expressed                                          | 0.498108    |
| Up-regulated gene locus | With motif or not | Annotation                                                                                  | Fold change |
| LOC_Os12g10340          | Y                 | NBS-LRR type resistance protein, putative, expressed                                        | 12.37035    |
| LOC_Os07g48060          | N                 | peroxidase precursor, putative, expressed                                                   | 9.229174    |
| LOC_Os10g40470          | N                 | LTPL142 - Protease inhibitor/seed storage/LTP family protein precursor, putative, expressed | 7.866752    |
| LOC_Os11g26750          | N                 | dehydrin, putative, expressed                                                               | 7.837323    |

|                |   |                                                                                   |          |
|----------------|---|-----------------------------------------------------------------------------------|----------|
| LOC_Os06g16790 | Y | go35 NBS-LRR, putative, expressed                                                 | 6.819676 |
| LOC_Os10g40480 | N | LTPL143 - Protease inhibitor/seed storage/LTP family protein precursor, expressed | 4.802609 |
| LOC_Os03g22010 | Y | peroxidase precursor, putative, expressed                                         | 3.792859 |
| LOC_Os10g38720 | Y | glutathione S-transferase, putative, expressed                                    | 3.137664 |
| LOC_Os06g11290 | Y | 12-oxophytodienoate reductase, putative, expressed                                | 3.124698 |
| LOC_Os03g44740 | Y | cytochrome P450, putative, expressed                                              | 3.075155 |
| LOC_Os03g05910 | Y | expressed protein                                                                 | 2.938844 |
| LOC_Os06g29470 | Y | peroxidase precursor, putative, expressed                                         | 2.836298 |
| LOC_Os02g42640 | N | CBS domain-containing protein, putative, expressed                                | 2.813498 |
| LOC_Os01g49240 | N | limonoid UDP-glucosyltransferase, putative, expressed                             | 2.762529 |
| LOC_Os07g12670 | N | expressed protein                                                                 | 2.683725 |
| LOC_Os07g12680 | N | LZ-NBS-LRR class RGA, putative, expressed                                         | 2.683725 |
| LOC_Os01g41430 | Y | UDP-glucuronosyl and UDP-glucosyl transferase, putative, expressed                | 2.605497 |
| LOC_Os03g07510 | N | expressed protein                                                                 | 2.523218 |
| LOC_Os05g42350 | Y | ferredoxin--nitrite reductase, putative, expressed                                | 2.450637 |
| LOC_Os11g43700 | Y | RGH1A, putative, expressed                                                        | 2.429681 |
| LOC_Os10g34020 | N | glutathione S-transferase, putative, expressed                                    | 2.422432 |
| LOC_Os12g17480 | Y | MLA12, putative, expressed                                                        | 2.342214 |
| LOC_Os03g19720 | N | EF hand family protein, putative, expressed                                       | 1.976056 |
| LOC_Os04g46970 | Y | glucosyltransferase, putative, expressed                                          | 2.240803 |
| LOC_Os02g39330 | N | CHIT1 - Chitinase family protein precursor, expressed                             | 2.194433 |
| LOC_Os04g44470 | N | KUN1 - Kunitz-type trypsin inhibitor precursor, expressed                         | 2.160361 |
| LOC_Os10g26460 | N | bHLH family protein, putative, expressed                                          | 2.125051 |
| LOC_Os03g09970 | Y | sulfate transporter, putative, expressed                                          | 2.116969 |
| LOC_Os10g38150 | N | glutathione S-transferase, N-terminal domain containing protein, expressed        | 2.086533 |

|                |   |                                                                 |          |
|----------------|---|-----------------------------------------------------------------|----------|
| LOC_Os10g20450 | N | MATE efflux family protein, putative, expressed                 | 2.060882 |
| LOC_Os03g02939 | N | peroxidase precursor, putative, expressed                       | 2.040954 |
| LOC_Os01g45110 | N | anthocyanin 3-O-beta-glucosyltransferase, putative, expressed   | 2.029371 |
| LOC_Os01g54890 | Y | ethylene-responsive transcription factor 2, putative, expressed | 3.101763 |
| LOC_Os02g41904 | Y | DEF7 - Defensin and Defensin-like DEFL family, expressed        | 2.008733 |

---



**Supplemental Table 7. Metabolism enrichment GO**

| Regulated gene<br>locus | With motif or not | GO name             | Reported name             | Fold change |
|-------------------------|-------------------|---------------------|---------------------------|-------------|
| LOC_Os01g72910          | N                 | response to stress  | <i>Asr2; ASR4; OsASR6</i> | 0.263295    |
| LOC_Os02g33820          | Y                 | response to stress  | <i>Asr3; OsASR3; ASR1</i> | 0.318189    |
| LOC_Os02g54140          | Y                 | response to stress  |                           | 0.462172    |
| LOC_Os03g14180          | N                 | response to stress  | <i>Oshsp26</i>            | 0.420111    |
| LOC_Os03g15960          | N                 | response to stress  |                           | 0.275764    |
| LOC_Os03g16920          | Y                 | response to stress  |                           | 0.439126    |
| LOC_Os03g53340          | N                 | response to stress  | <i>OsHsfA2a</i>           | 0.287179    |
| LOC_Os04g01740          | N                 | response to stress  |                           | 0.313167    |
| LOC_Os04g34600          | N                 | response to stress  | <i>Asr4; ASR6; OsASR2</i> | 0.321127    |
| LOC_Os06g11290          | N                 | response to stress  | <i>OsOPR1</i>             | 3.124698    |
| LOC_Os06g14240          | N                 | response to stress  |                           | 0.212333    |
| LOC_Os09g35790          | N                 | response to stress  | <i>OsHsfB2c</i>           | 0.338428    |
| LOC_Os11g26750          | N                 | response to stress  |                           | 7.837323    |
| LOC_Os01g43774          | Y                 | oxidation reduction |                           | 0.469288    |
| LOC_Os01g50530          | N                 | oxidation reduction |                           | 2.067259    |
| LOC_Os01g50580          | N                 | oxidation reduction | <i>SLB2</i>               | 2.603583    |
| LOC_Os01g51860          | Y                 | oxidation reduction |                           | 0.314395    |
| LOC_Os01g70540          | N                 | oxidation reduction |                           | 2.395988    |
| LOC_Os02g01890          | Y                 | oxidation reduction |                           | 0.413001    |
| LOC_Os02g02400          | Y                 | oxidation reduction | <i>OsCATA</i>             | 0.439709    |
| LOC_Os02g21810          | N                 | oxidation reduction |                           | 3.926823    |
| LOC_Os03g02939          | N                 | oxidation reduction |                           | 2.040954    |

|                |   |                     |                           |          |
|----------------|---|---------------------|---------------------------|----------|
| LOC_Os03g03910 | N | oxidation reduction | <i>OsCATC;noel</i>        | 0.312744 |
|                |   |                     | <i>OsCYP96B4; OsDSSI;</i> |          |
| LOC_Os03g04680 | N | oxidation reduction | <i>sd37; bsh1</i>         | 0.345122 |
| LOC_Os03g13210 | N | oxidation reduction |                           | 0.305255 |
| LOC_Os03g22010 | N | oxidation reduction |                           | 3.792859 |
| LOC_Os03g25330 | N | oxidation reduction |                           | 0.446238 |
| LOC_Os03g44740 | N | oxidation reduction |                           | 3.075155 |
| LOC_Os03g49350 | N | oxidation reduction | <i>OsLOX4</i>             | 0.470037 |
| LOC_Os03g52860 | N | oxidation reduction | <i>L-2</i>                | 0.481977 |
| LOC_Os03g59100 | N | oxidation reduction |                           | 2.103895 |
| LOC_Os04g04770 | N | oxidation reduction |                           | 3.228668 |
| LOC_Os04g15920 | N | oxidation reduction |                           | 0.439673 |
| LOC_Os04g37490 | N | oxidation reduction |                           | 0.26934  |
| LOC_Os05g04490 | Y | oxidation reduction |                           | 0.105475 |
| LOC_Os05g06970 | Y | oxidation reduction |                           | 0.294983 |
| LOC_Os06g29470 | N | oxidation reduction |                           | 2.836298 |
| LOC_Os06g32990 | N | oxidation reduction |                           | 0.488878 |
| LOC_Os06g33100 | Y | oxidation reduction |                           | 0.334132 |
| LOC_Os07g01410 | Y | oxidation reduction |                           | 0.185569 |
| LOC_Os07g07440 | N | oxidation reduction |                           | 2.157196 |
| LOC_Os07g23570 | N | oxidation reduction |                           | 2.794491 |
| LOC_Os07g32570 | N | oxidation reduction |                           | 4.675741 |
| LOC_Os07g34670 | Y | oxidation reduction |                           | 0.427213 |
| LOC_Os07g37420 | N | oxidation reduction |                           | 0.280513 |
| LOC_Os07g48020 | Y | oxidation reduction |                           | 0.401572 |
| LOC_Os07g48030 | Y | oxidation reduction |                           | 0.262527 |

|                |   |                                |                         |          |
|----------------|---|--------------------------------|-------------------------|----------|
| LOC_Os07g48060 | N | oxidation reduction            |                         | 9.229174 |
| LOC_Os08g01510 | Y | oxidation reduction            |                         | 0.377787 |
| LOC_Os08g16910 | N | oxidation reduction            |                         | 0.212657 |
| LOC_Os08g35210 | Y | oxidation reduction            | <i>OsrbohE; Osrboh6</i> | 0.435499 |
| LOC_Os08g36860 | Y | oxidation reduction            | <i>OsABA8ox2</i>        | 0.489379 |
| LOC_Os09g23820 | N | oxidation reduction            |                         | 2.553159 |
| LOC_Os09g26960 | N | oxidation reduction            |                         | 0.361678 |
| LOC_Os09g27820 | N | oxidation reduction            | <i>OsACOI; OsACO2</i>   | 0.156338 |
| LOC_Os10g26340 | N | oxidation reduction            | <i>PLAI</i>             | 0.288169 |
| LOC_Os10g31780 | N | oxidation reduction            |                         | 4.147934 |
| LOC_Os10g36980 | N | oxidation reduction            |                         | 2.0643   |
| LOC_Os11g02130 | Y | oxidation reduction            |                         | 0.46316  |
| LOC_Os11g14910 | N | oxidation reduction            |                         | 0.248551 |
| LOC_Os12g12590 | Y | oxidation reduction            |                         | 0.277789 |
| LOC_Os11g02440 | N | flavonoid biosynthetic process |                         | 0.480264 |
| LOC_Os12g02370 | N | flavonoid biosynthetic process |                         | 0.497093 |
| LOC_Os01g47070 | Y | carbohydrate metabolic process |                         | 0.301164 |
| LOC_Os02g39330 | N | carbohydrate metabolic process |                         | 2.194433 |
| LOC_Os04g09390 | N | chitin catabolic process       |                         | 0.397567 |
| LOC_Os10g39680 | Y | carbohydrate metabolic process |                         | 0.357747 |
| LOC_Os04g46810 | N | lipid transport                |                         | 2.091987 |
| LOC_Os04g46820 | N | lipid transport                |                         | 2.583613 |
| LOC_Os10g20840 | N | lipid transport                |                         | 0.313038 |
| LOC_Os10g40460 | N | lipid transport                |                         | 3.809346 |
| LOC_Os10g40470 | N | lipid transport                |                         | 7.866752 |
| LOC_Os10g40480 | N | lipid transport                |                         | 4.802609 |

|                |   |                                |               |          |
|----------------|---|--------------------------------|---------------|----------|
| LOC_Os01g16310 | N | carbohydrate metabolic process |               | 16.34506 |
| LOC_Os01g51570 | N | carbohydrate metabolic process |               | 0.472272 |
| LOC_Os01g71380 | N | carbohydrate metabolic process |               | 0.257565 |
| LOC_Os01g71820 | Y | carbohydrate metabolic process |               | 0.441081 |
| LOC_Os02g10300 | N | carbohydrate metabolic process |               | 0.41468  |
| LOC_Os02g17900 | N | carbohydrate metabolic process |               | 0.475252 |
| LOC_Os05g09500 | N | carbohydrate metabolic process | <i>OsHXK7</i> | 2.008142 |
| LOC_Os05g20020 | Y | carbohydrate metabolic process |               | 0.430197 |
| LOC_Os06g46340 | Y | carbohydrate metabolic process |               | 0.340786 |
| LOC_Os07g35560 | N | carbohydrate metabolic process |               | 0.205874 |
| LOC_Os08g13980 | N | carbohydrate metabolic process |               | 2.79328  |
| LOC_Os08g40680 | Y | carbohydrate metabolic process |               | 0.427259 |
| LOC_Os09g31410 | N | carbohydrate metabolic process |               | 0.228296 |
| LOC_Os09g31430 | N | carbohydrate metabolic process |               | 0.417194 |
| LOC_Os09g35800 | N | carbohydrate metabolic process |               | 0.373529 |

---
